# Supplementary material for: One-pot synthesis of 3-aminofurans using a simple and efficient recyclable CuI/[bmim]PF6 system
Source: Royal Society of Chemistry journal article supplement (doi:10.1039/d1ob01132d), 2021-01-01

## One-pot synthesis of 3-aminofurans using a simple and efficient recyclable CuI/[bmim]PF<sub>6</sub> system

Veeranna Guguloth<sup>a</sup>, Ramesh Balaboina<sup>a</sup>, Narasimha Swamy Thirukovela<sup>b\*</sup>, Ravinder Vadde<sup>a\*</sup>

<sup>a</sup>Department of Chemistry, Kakatiya University, Warangal, T.S. India; Email: ravichemkuc@gmail.com

<sup>b</sup>Department of Chemistry, Chaitanya (Deemed to be University), Warangal, T.S. India; Email: thirukovelann@gmail.com

---

| Table of Contents               | Page No |
|---------------------------------|---------|
| NMR Spectra of Compounds 4(a-x) | S2-S25  |

# NMR Spectra of Compound

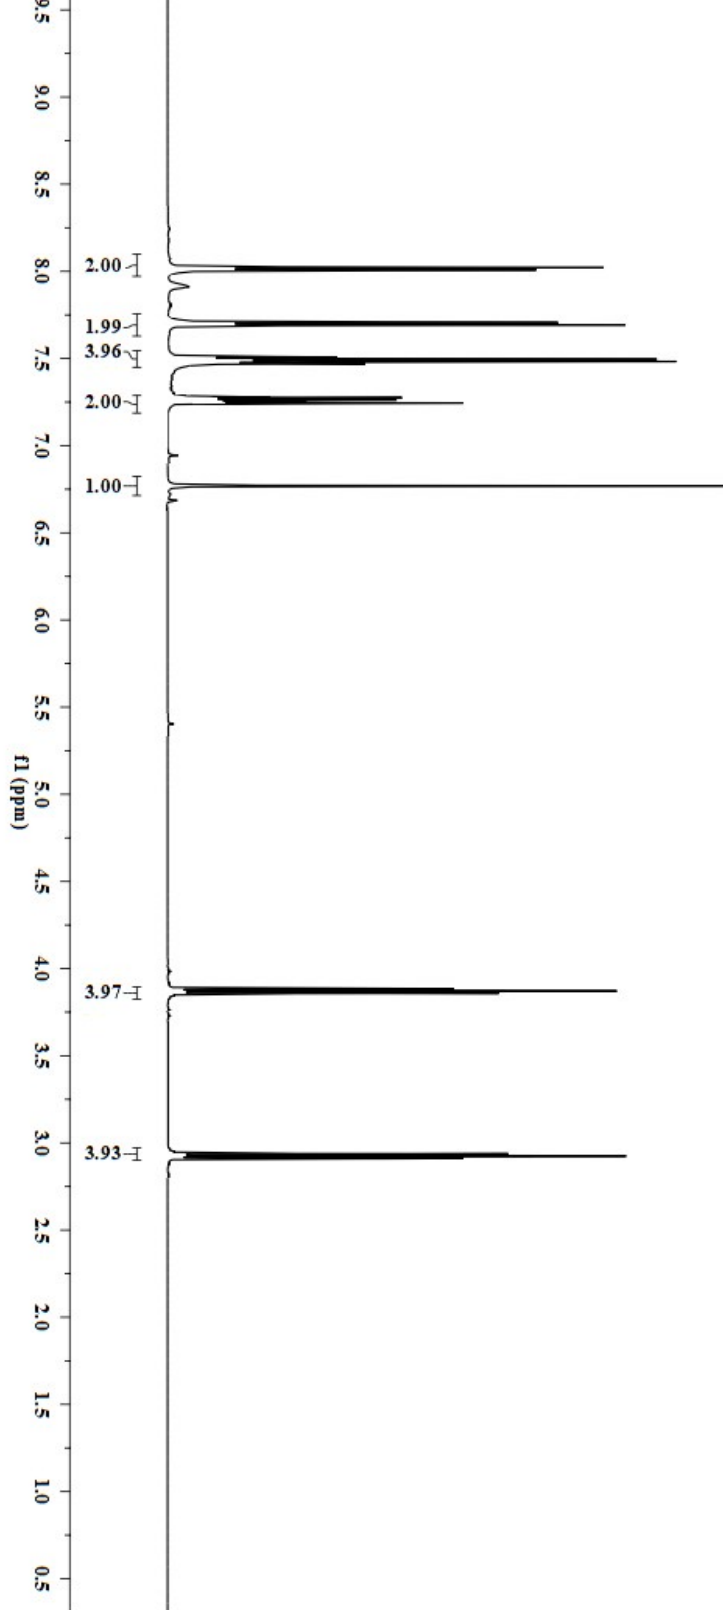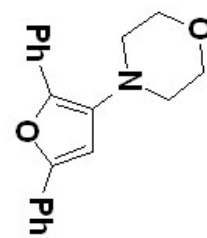

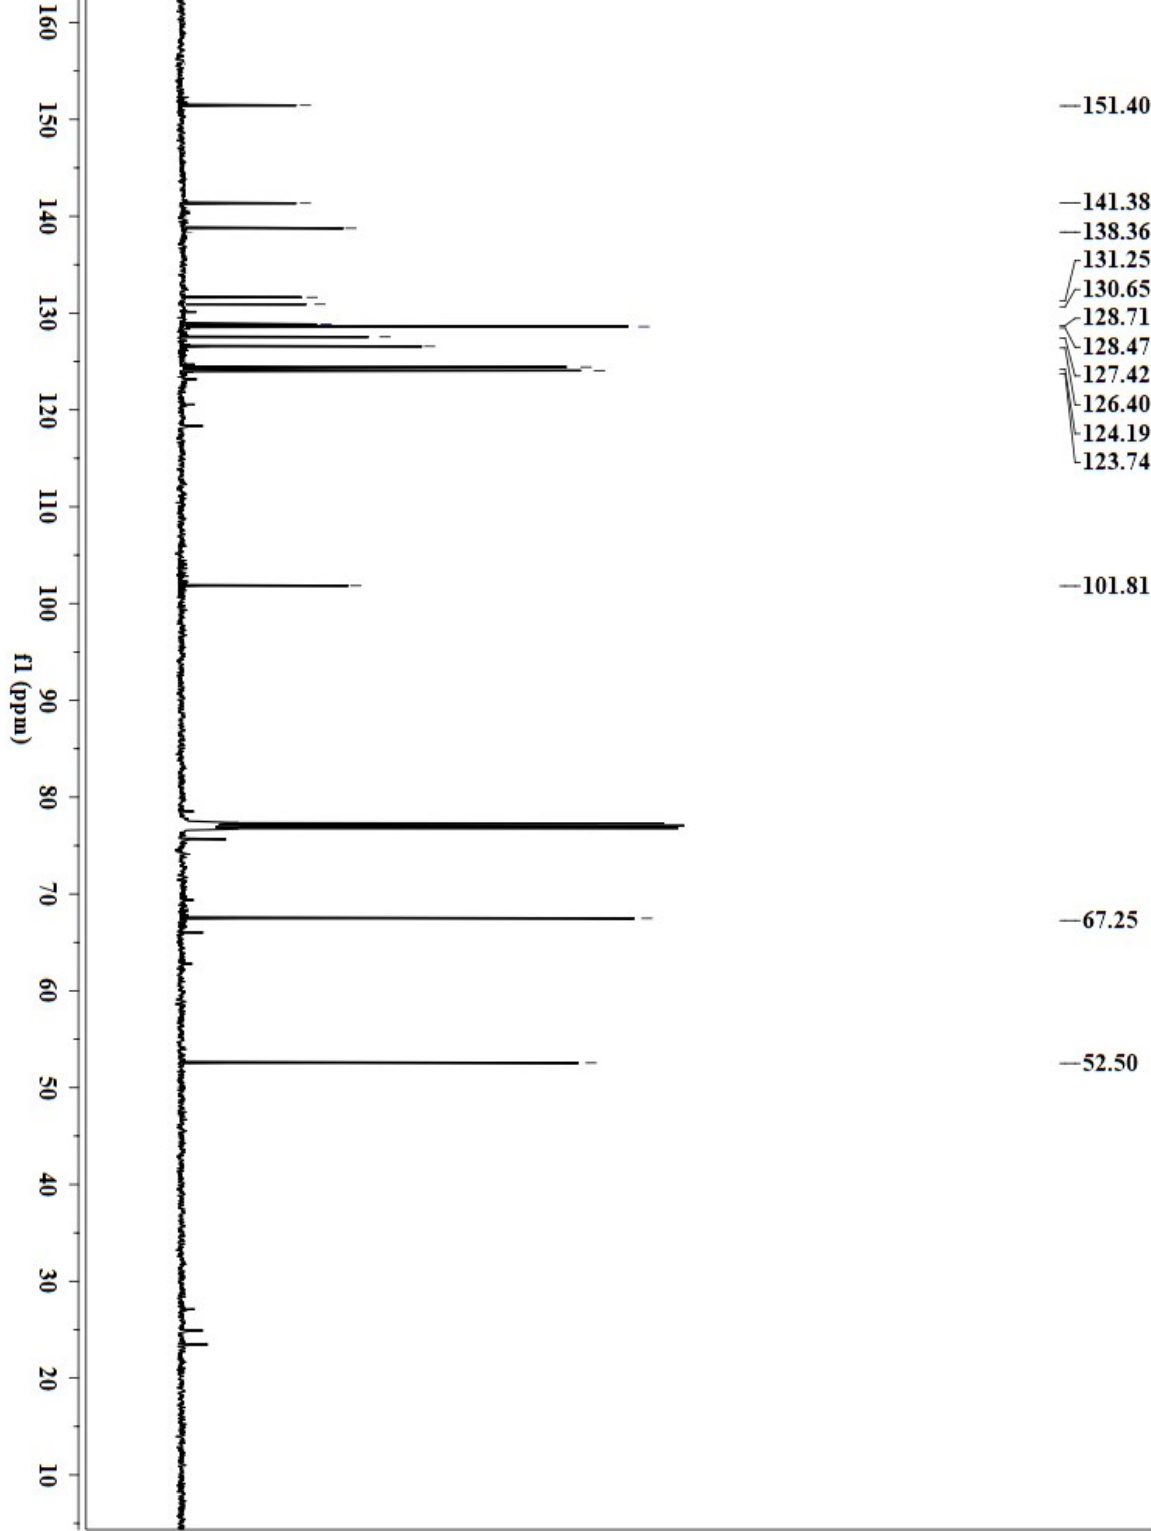

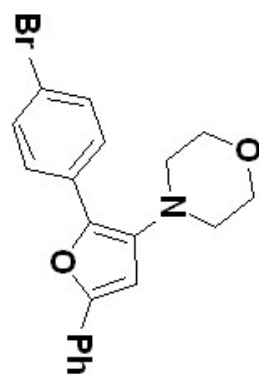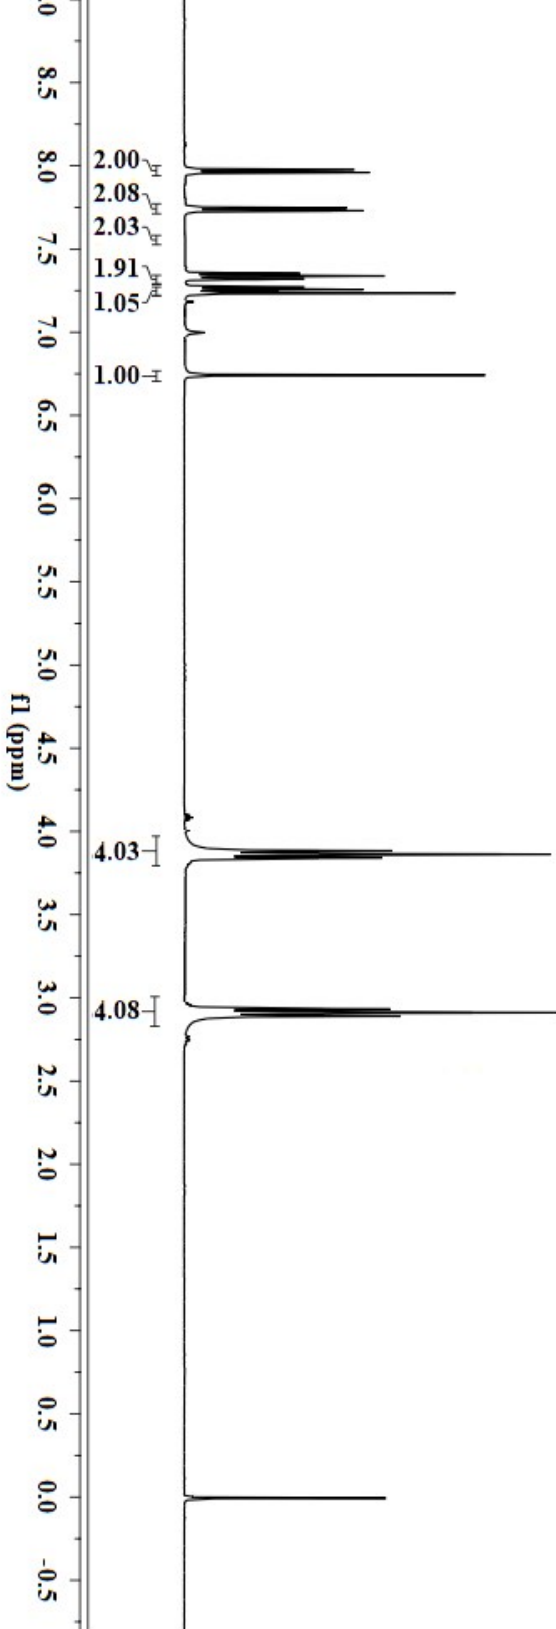

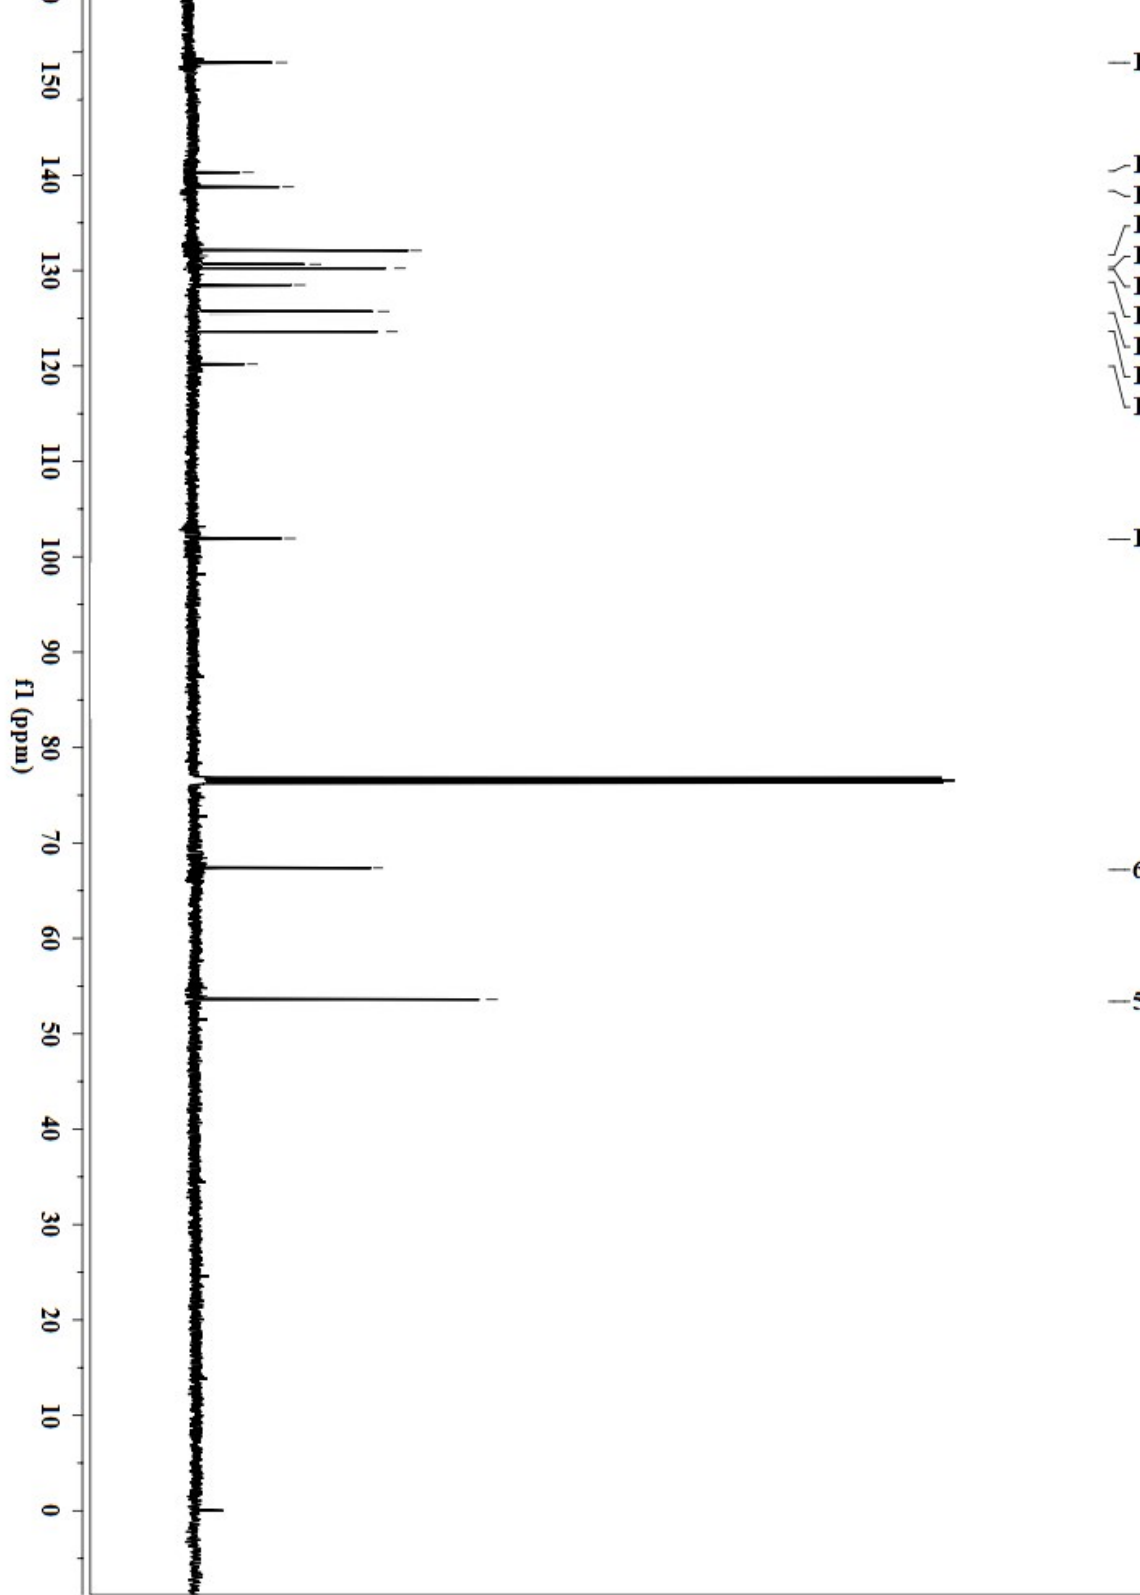

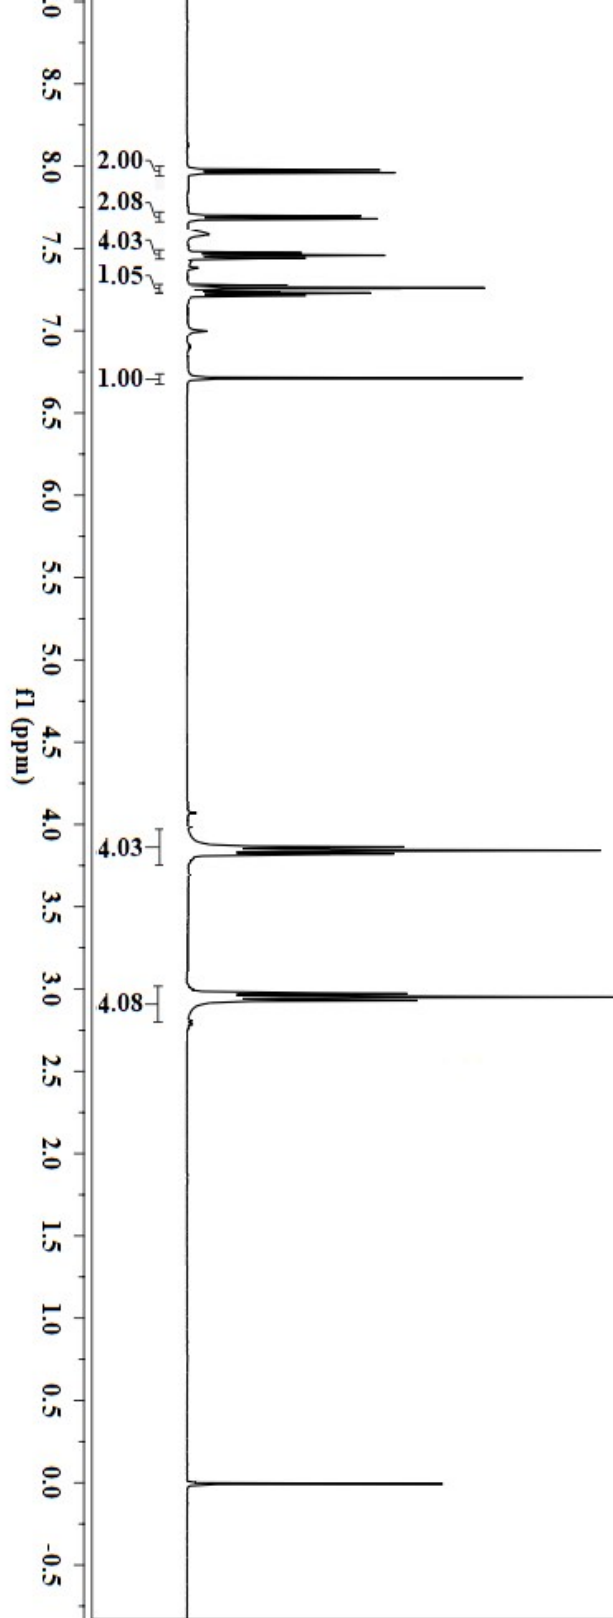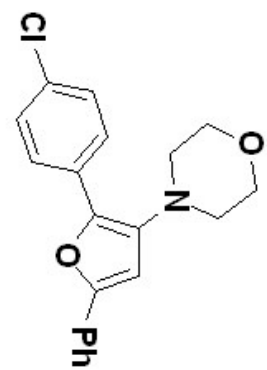

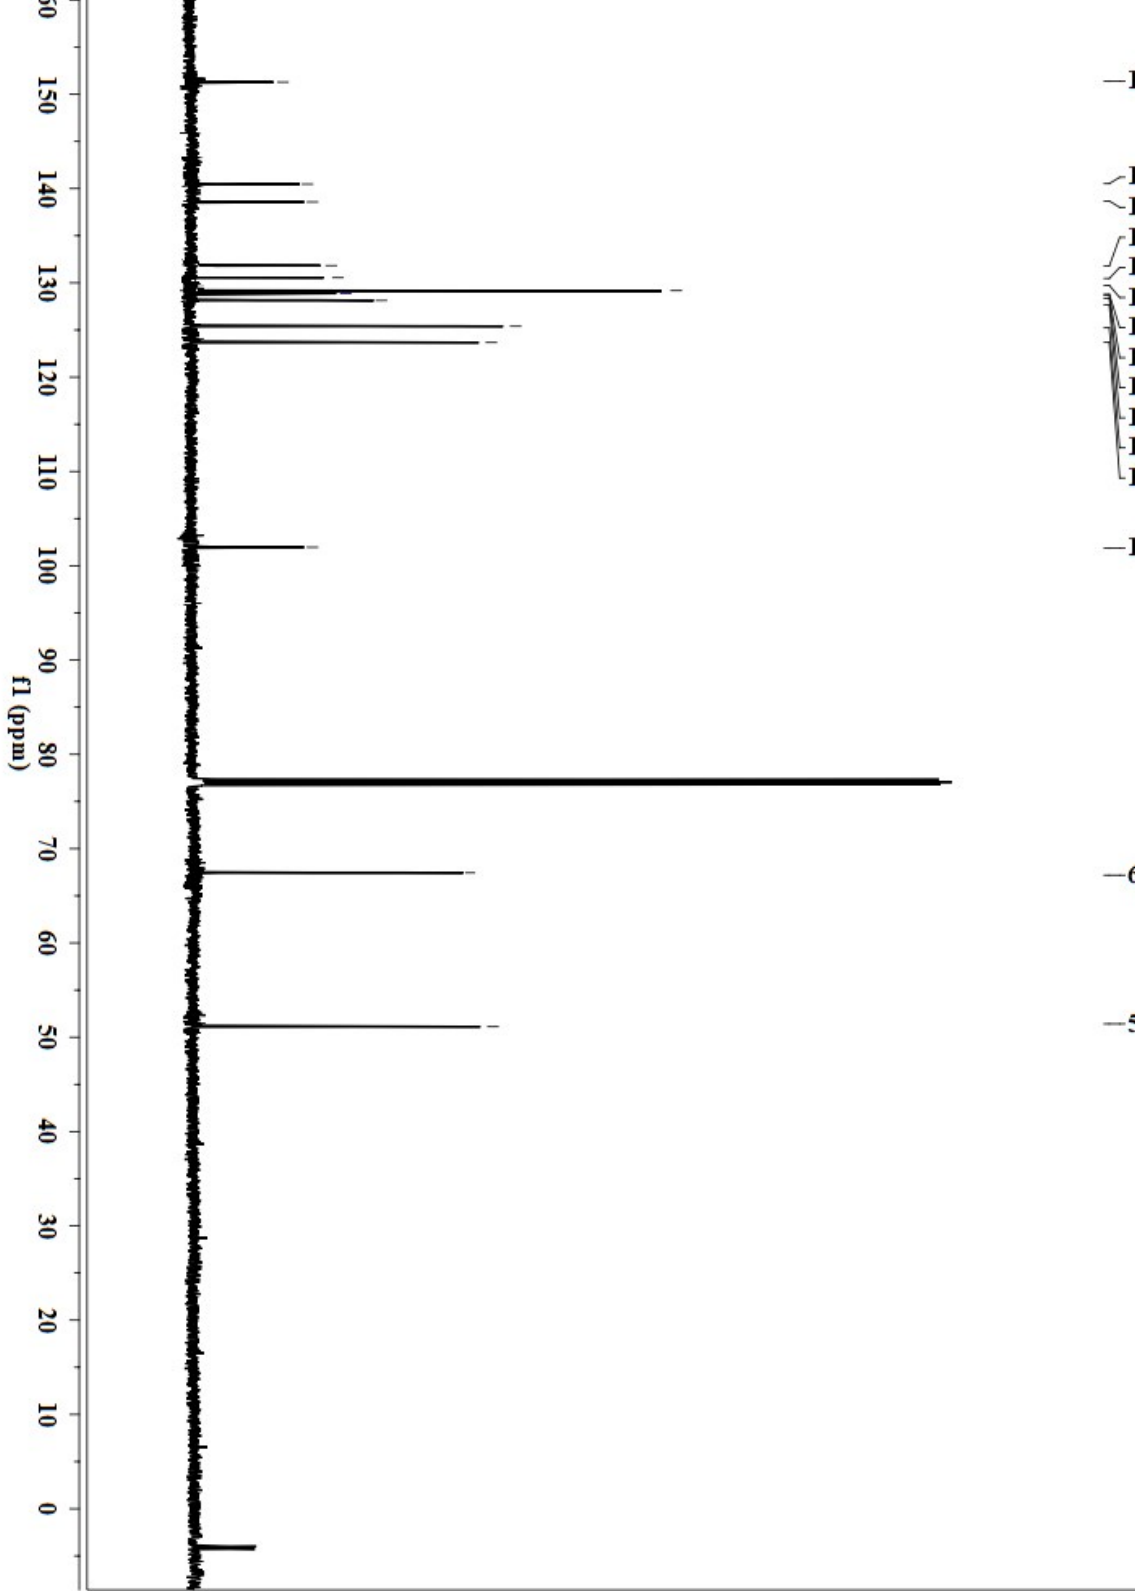

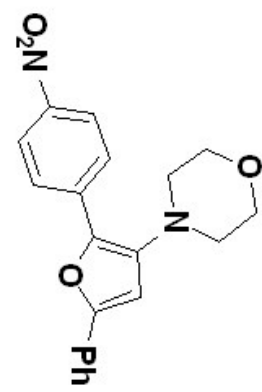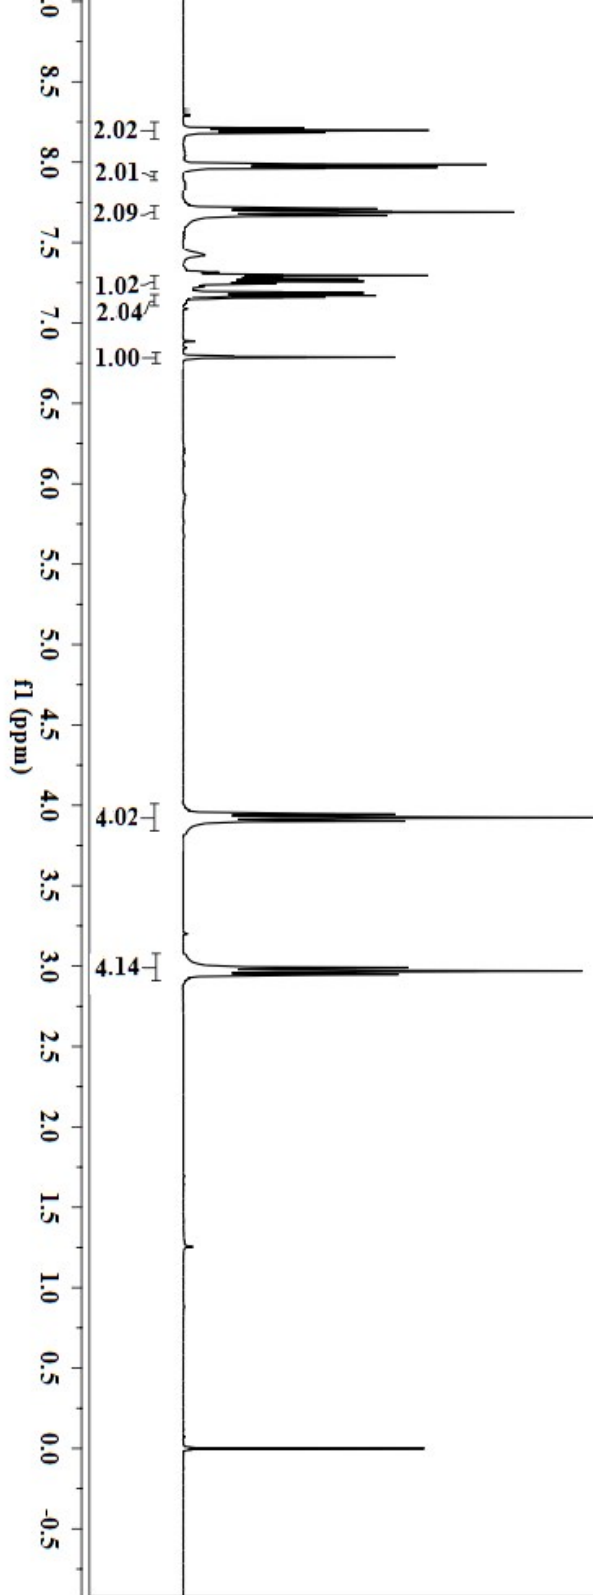



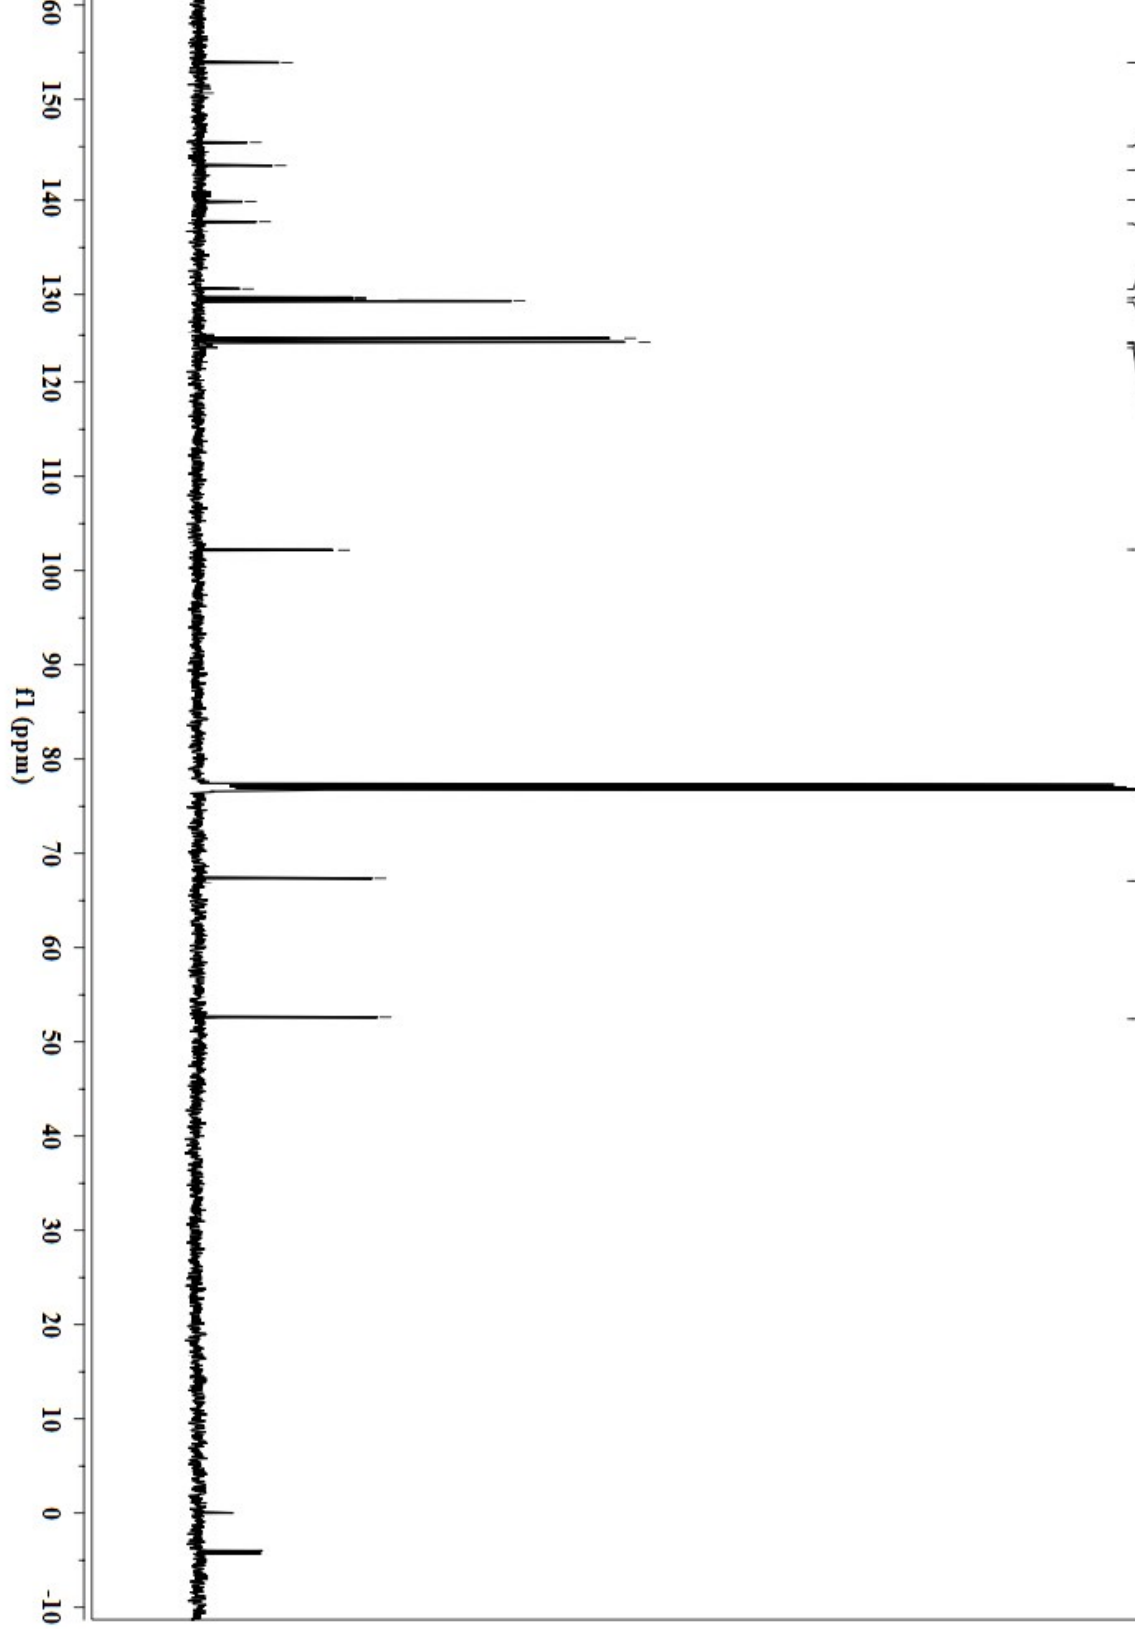

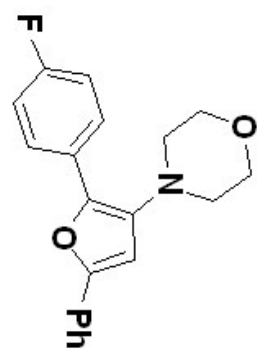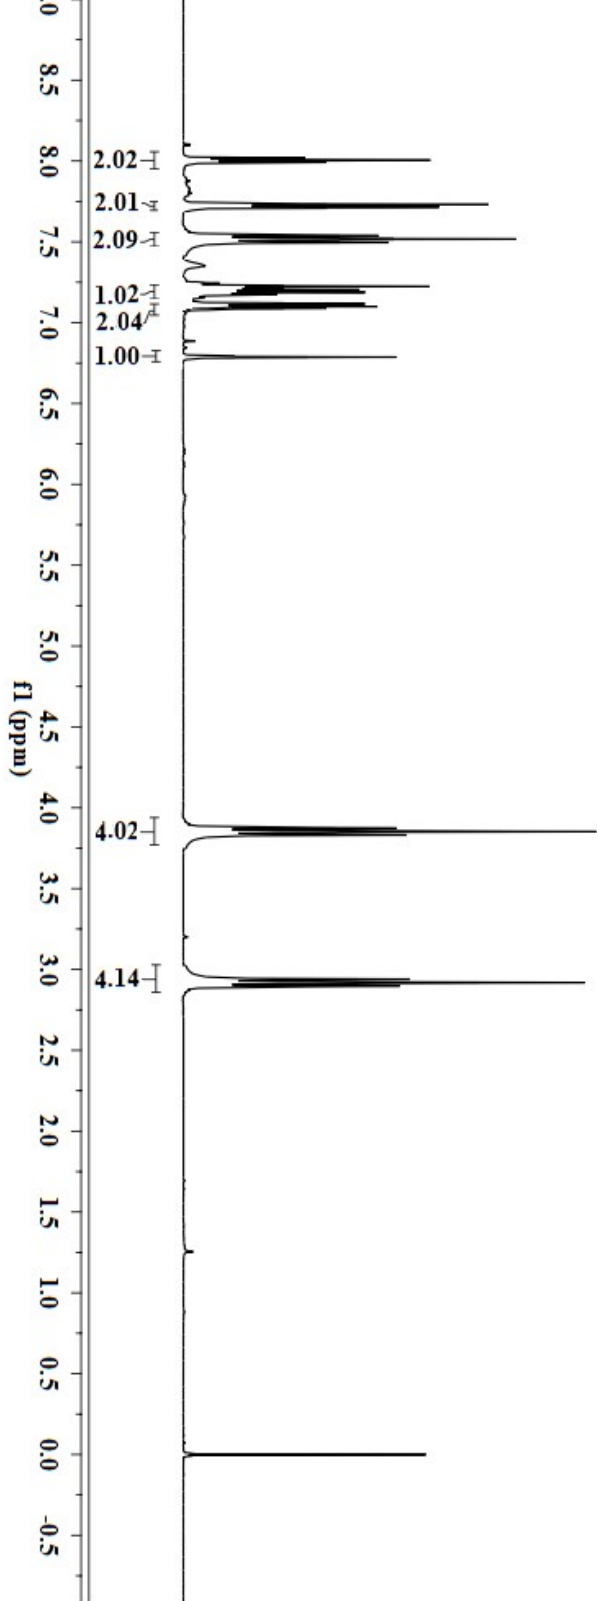

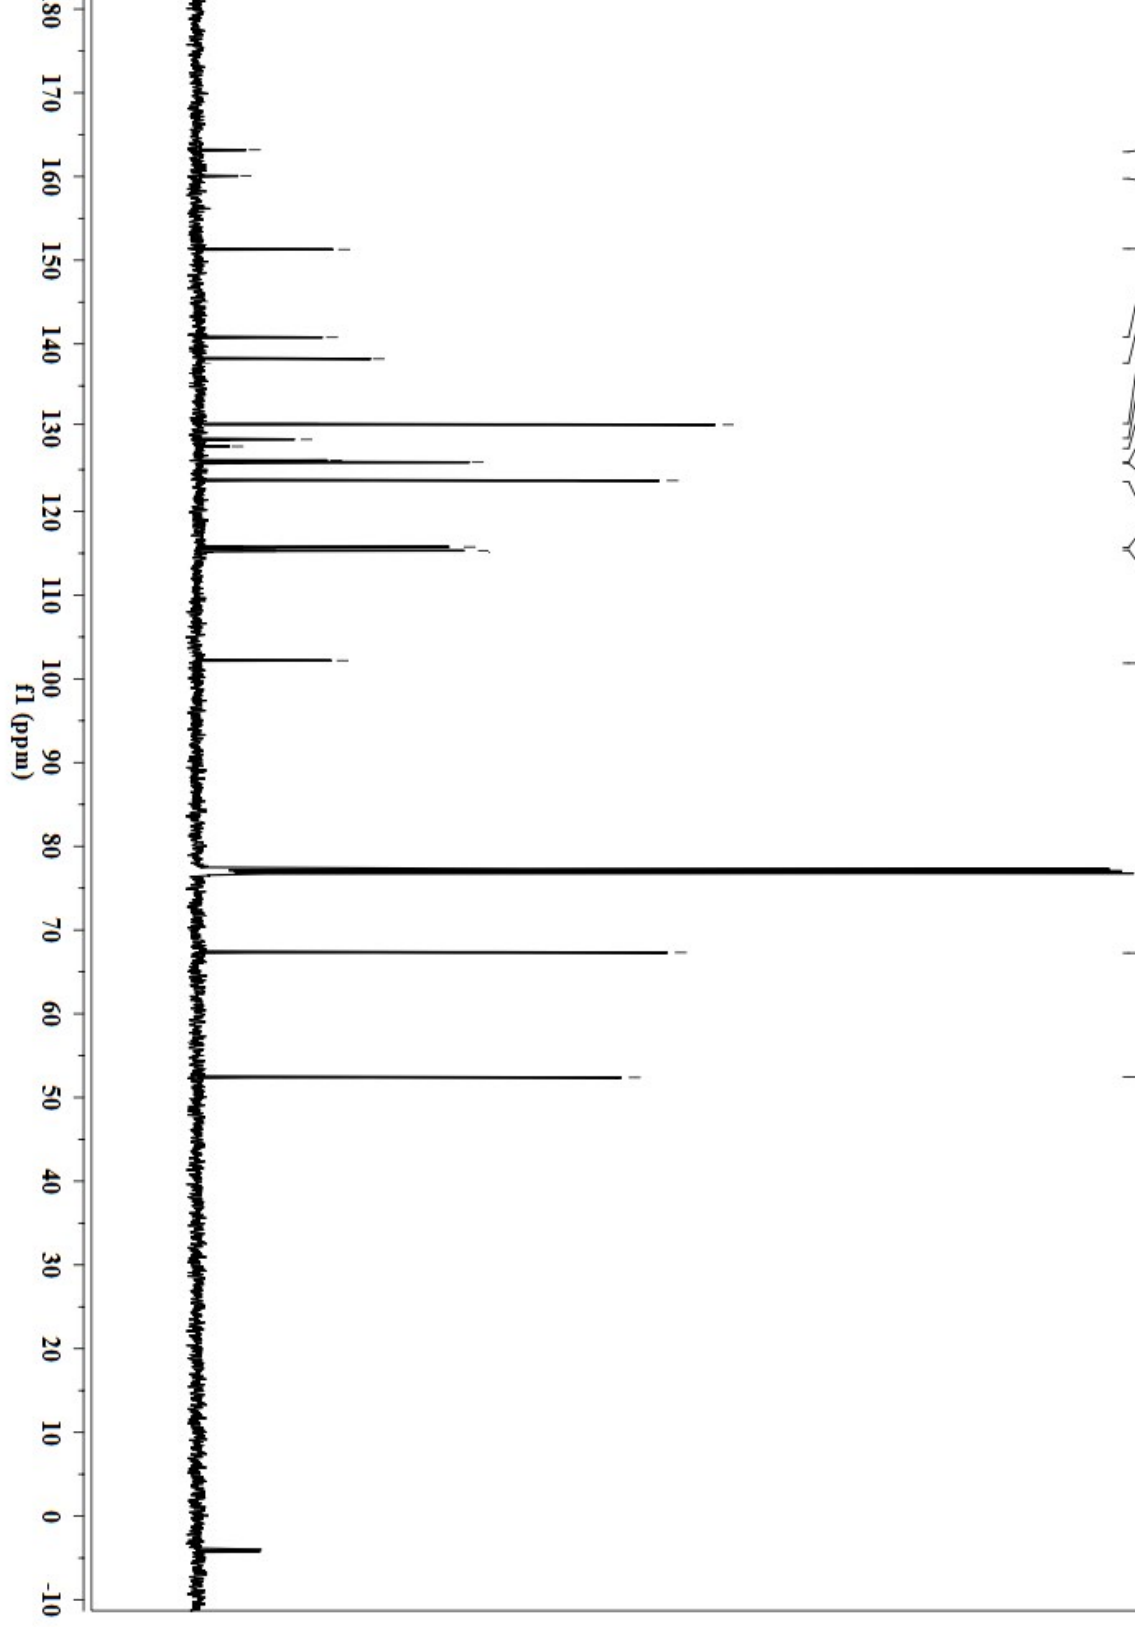

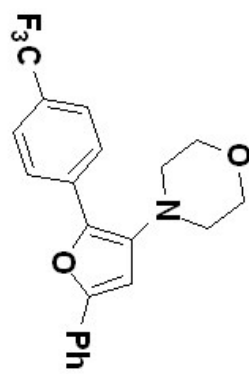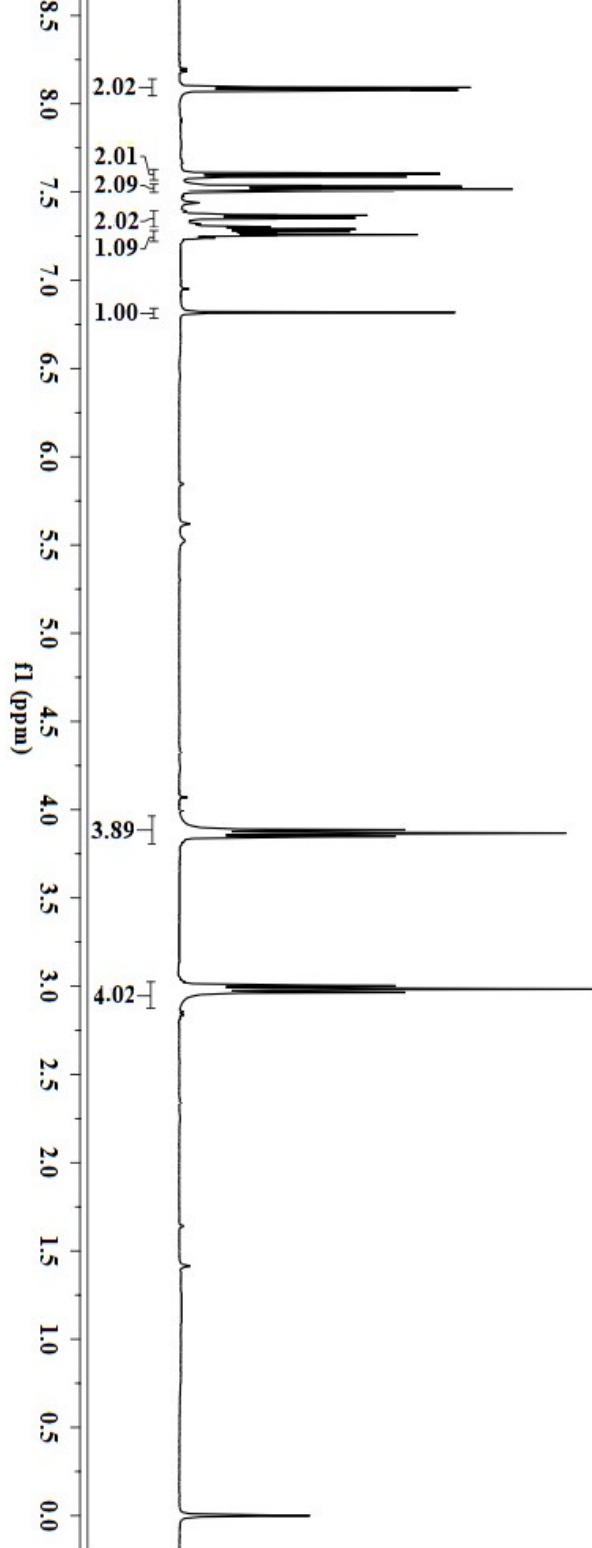

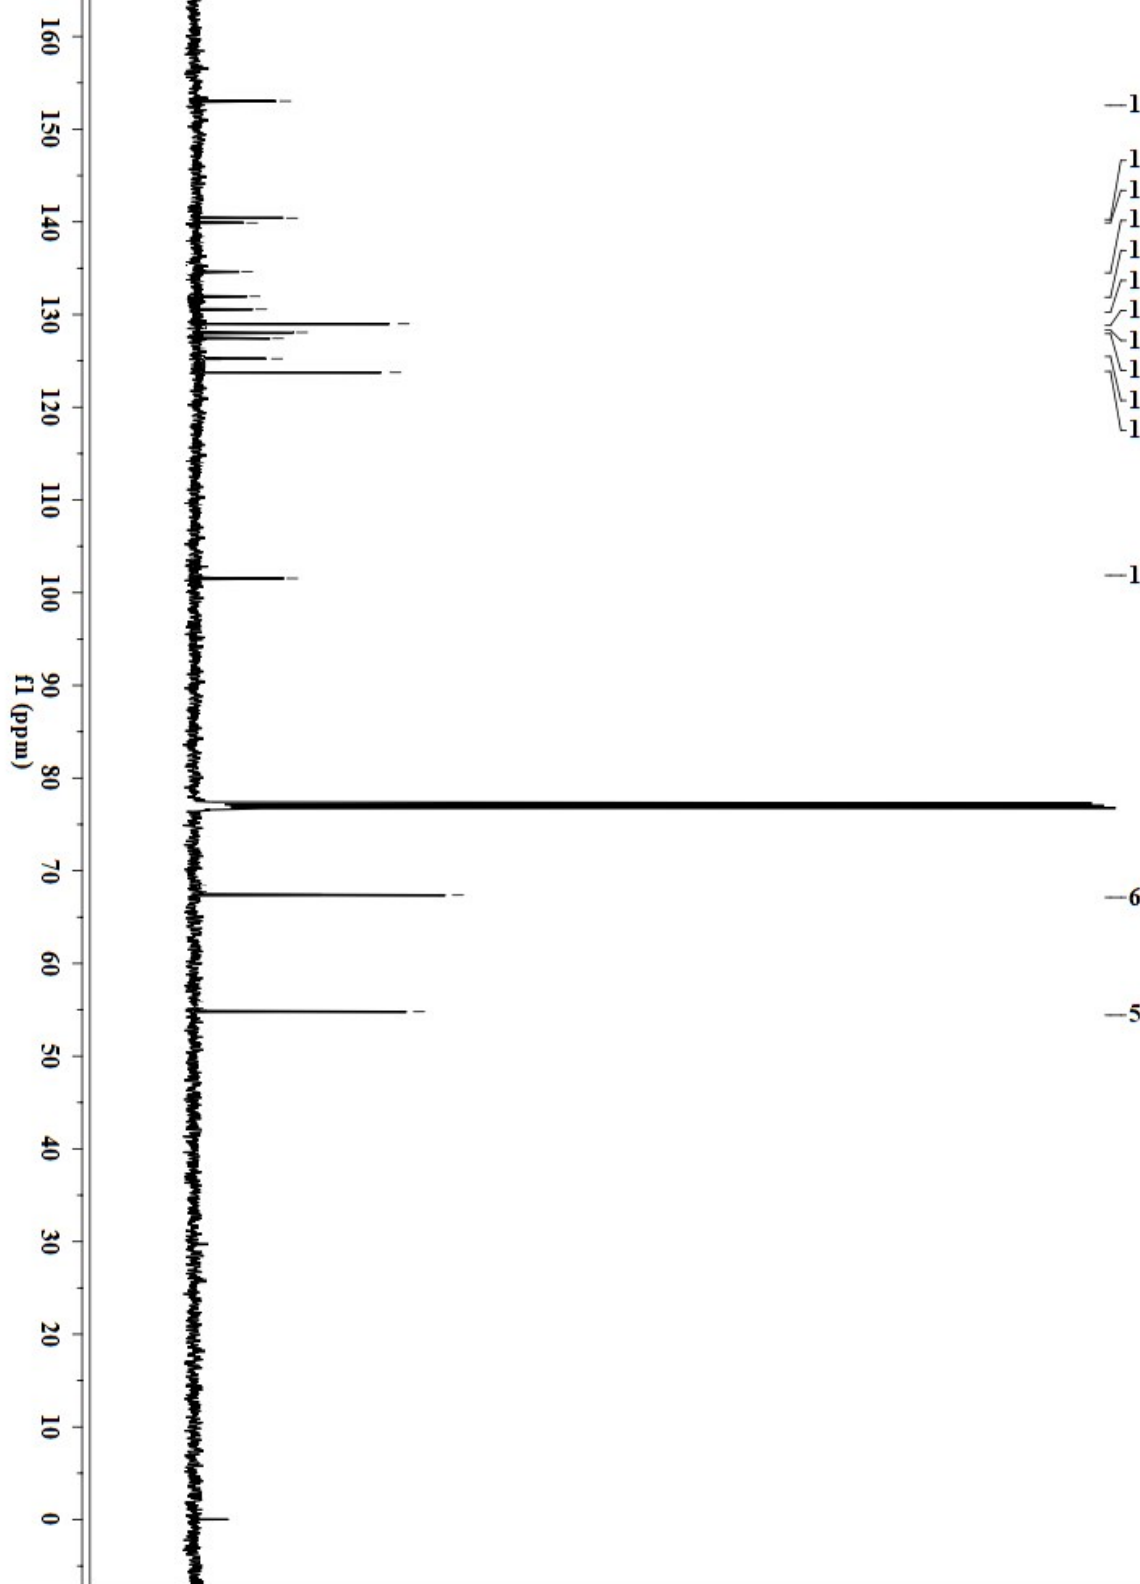

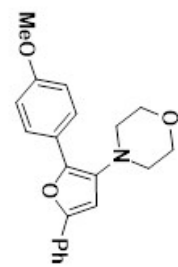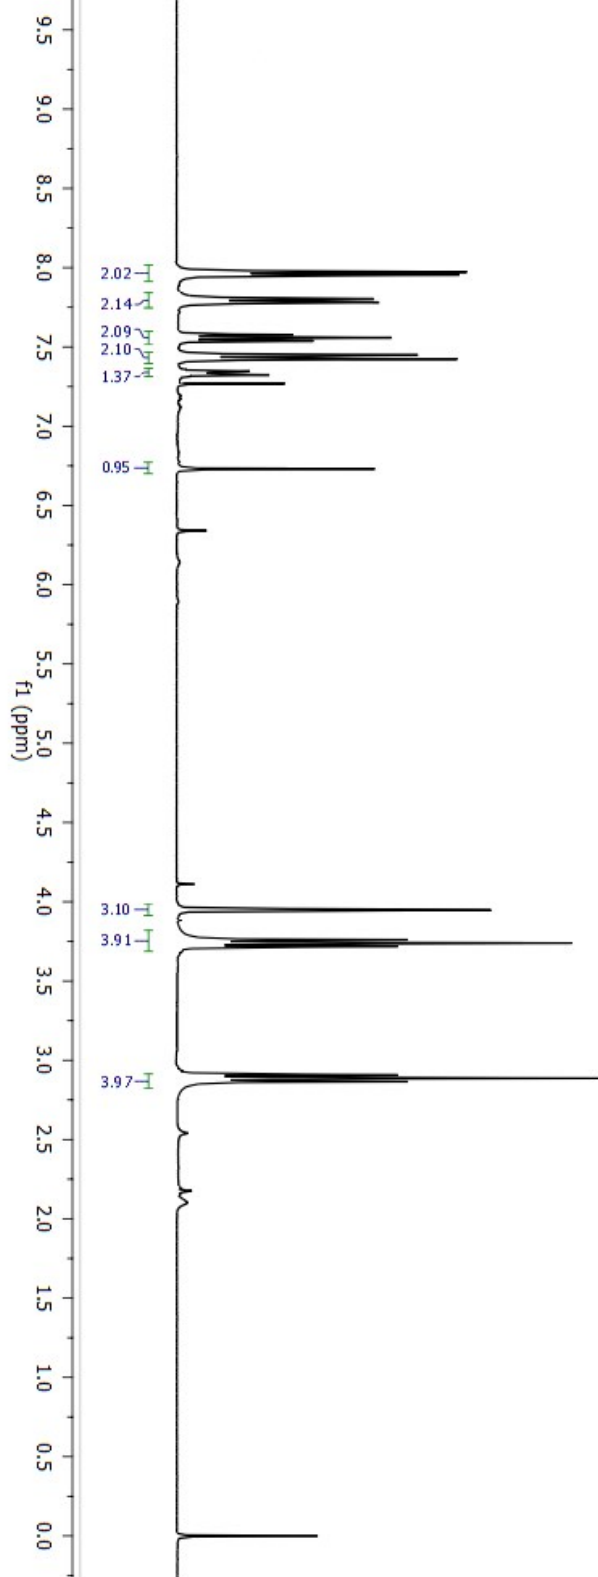

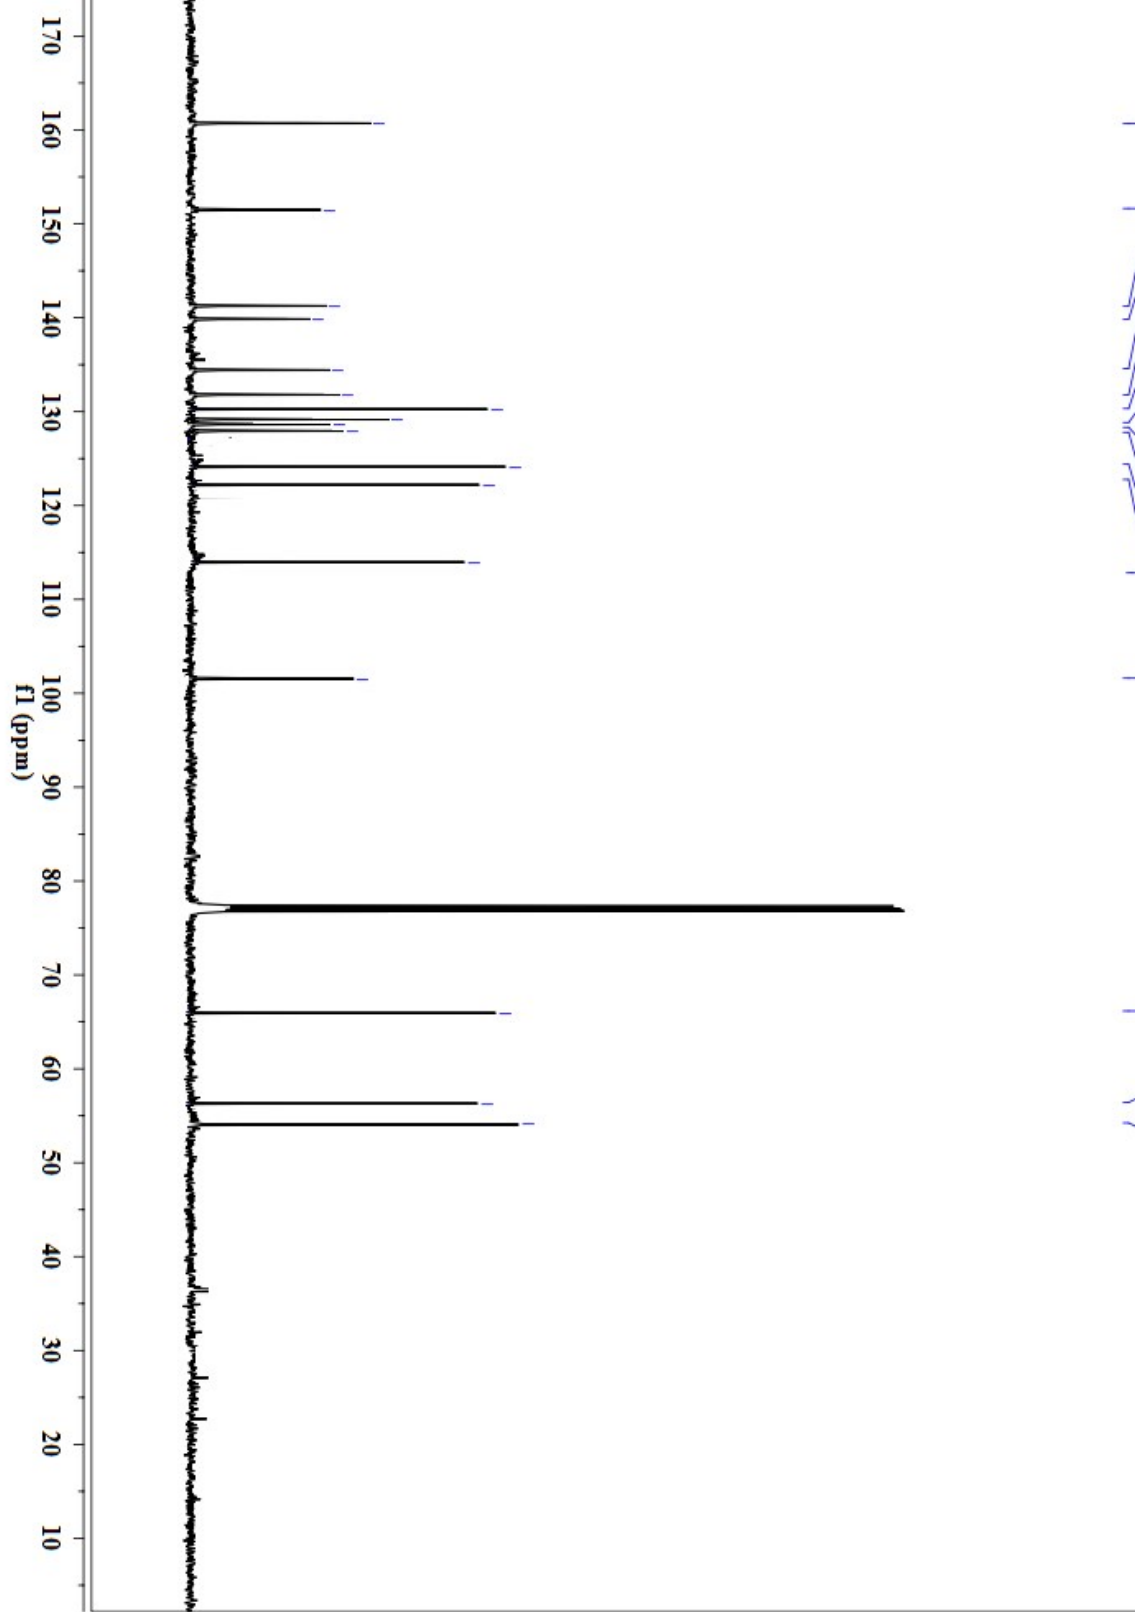

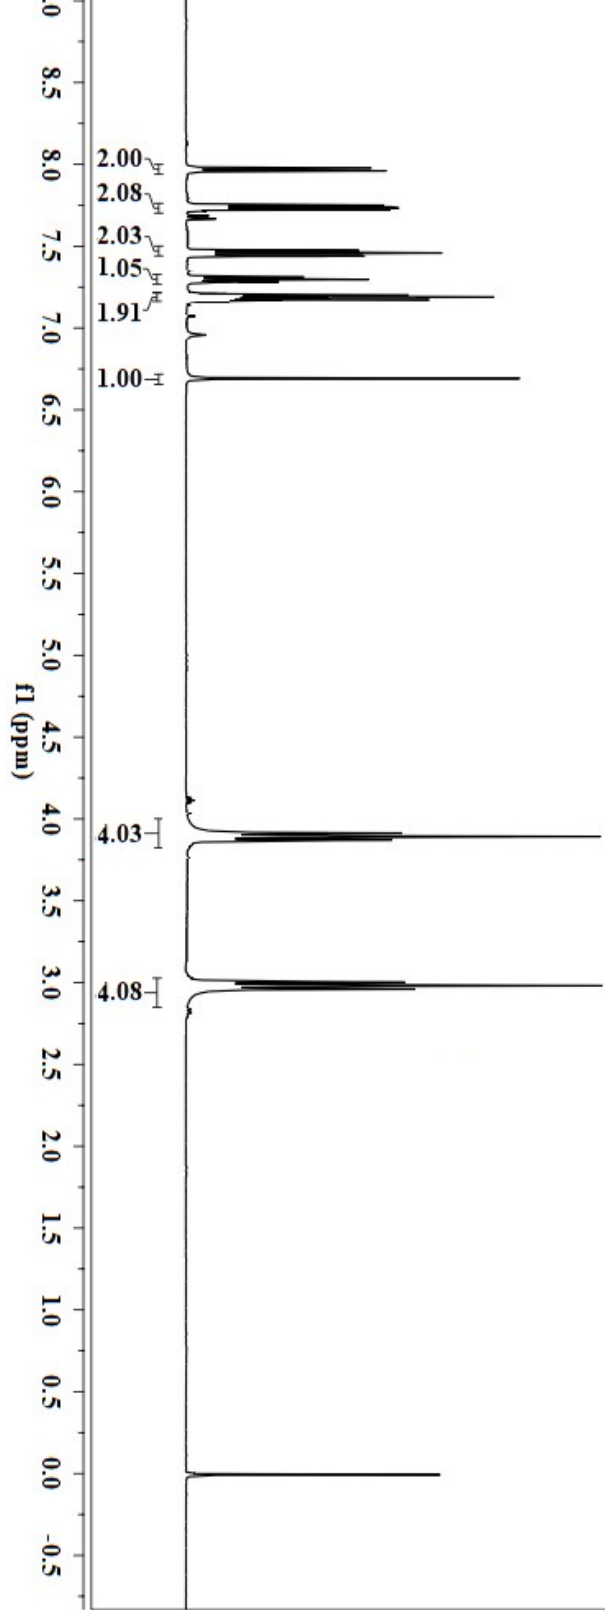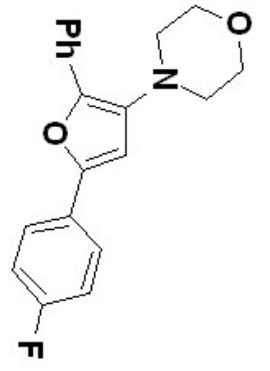



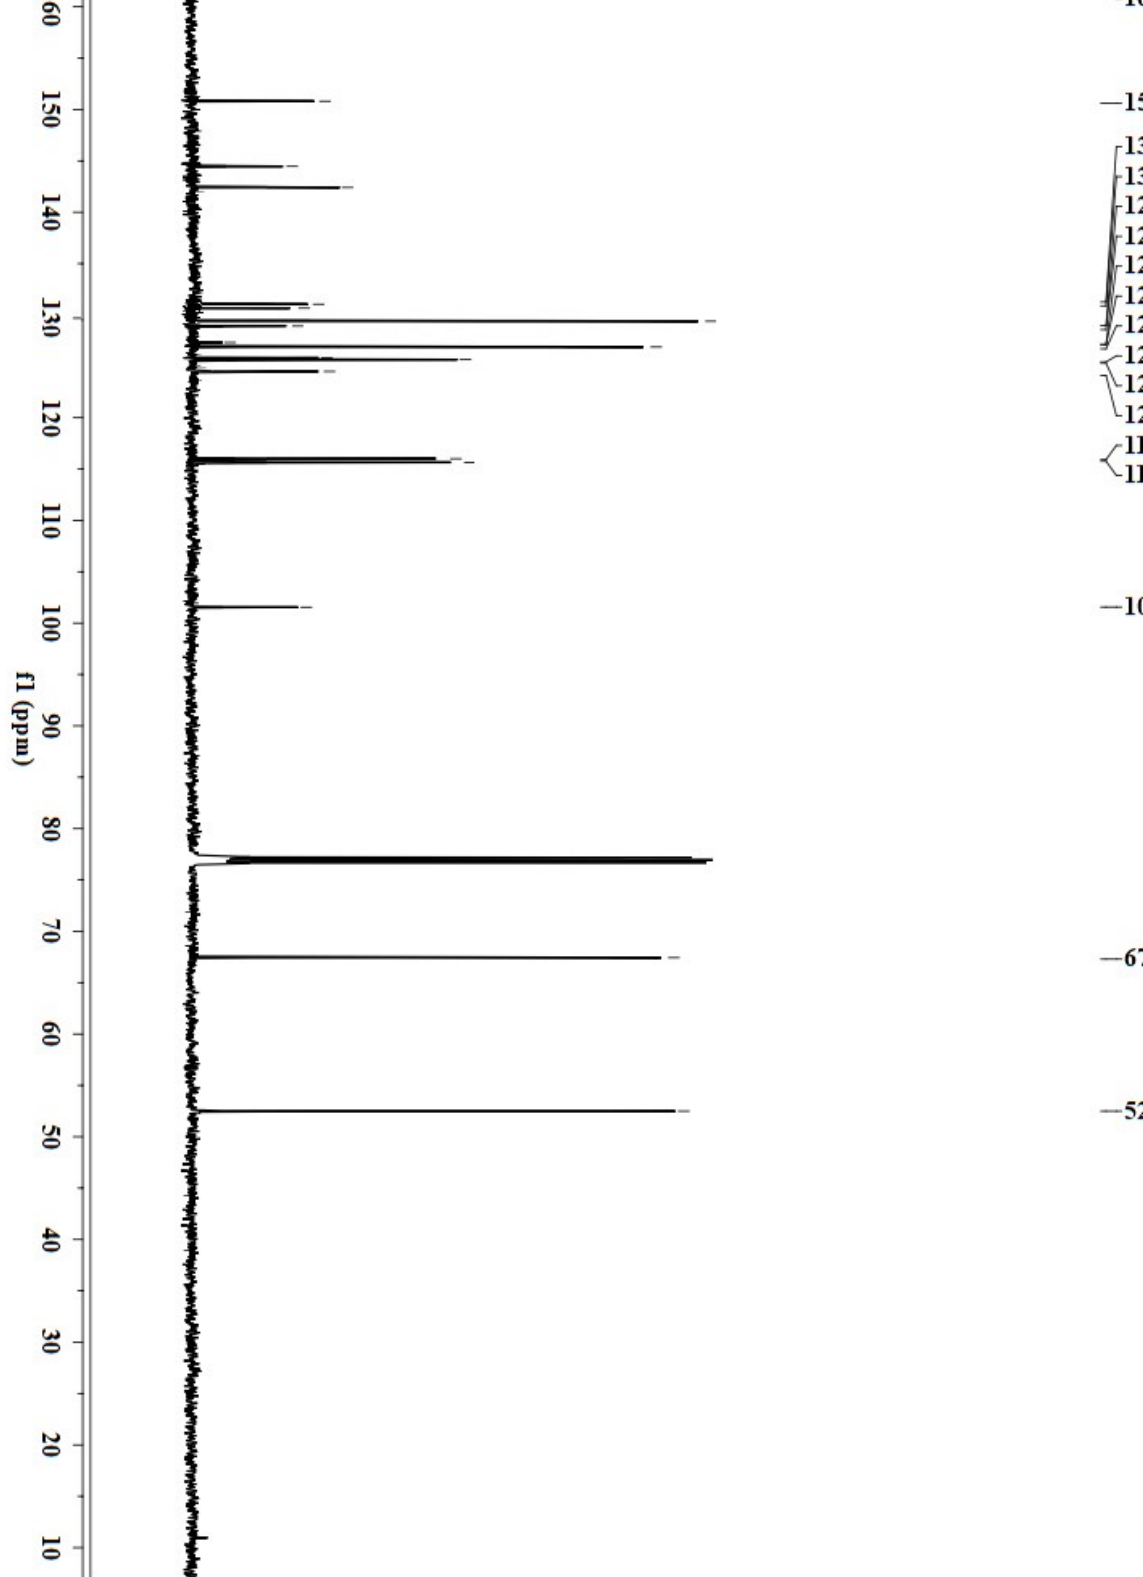

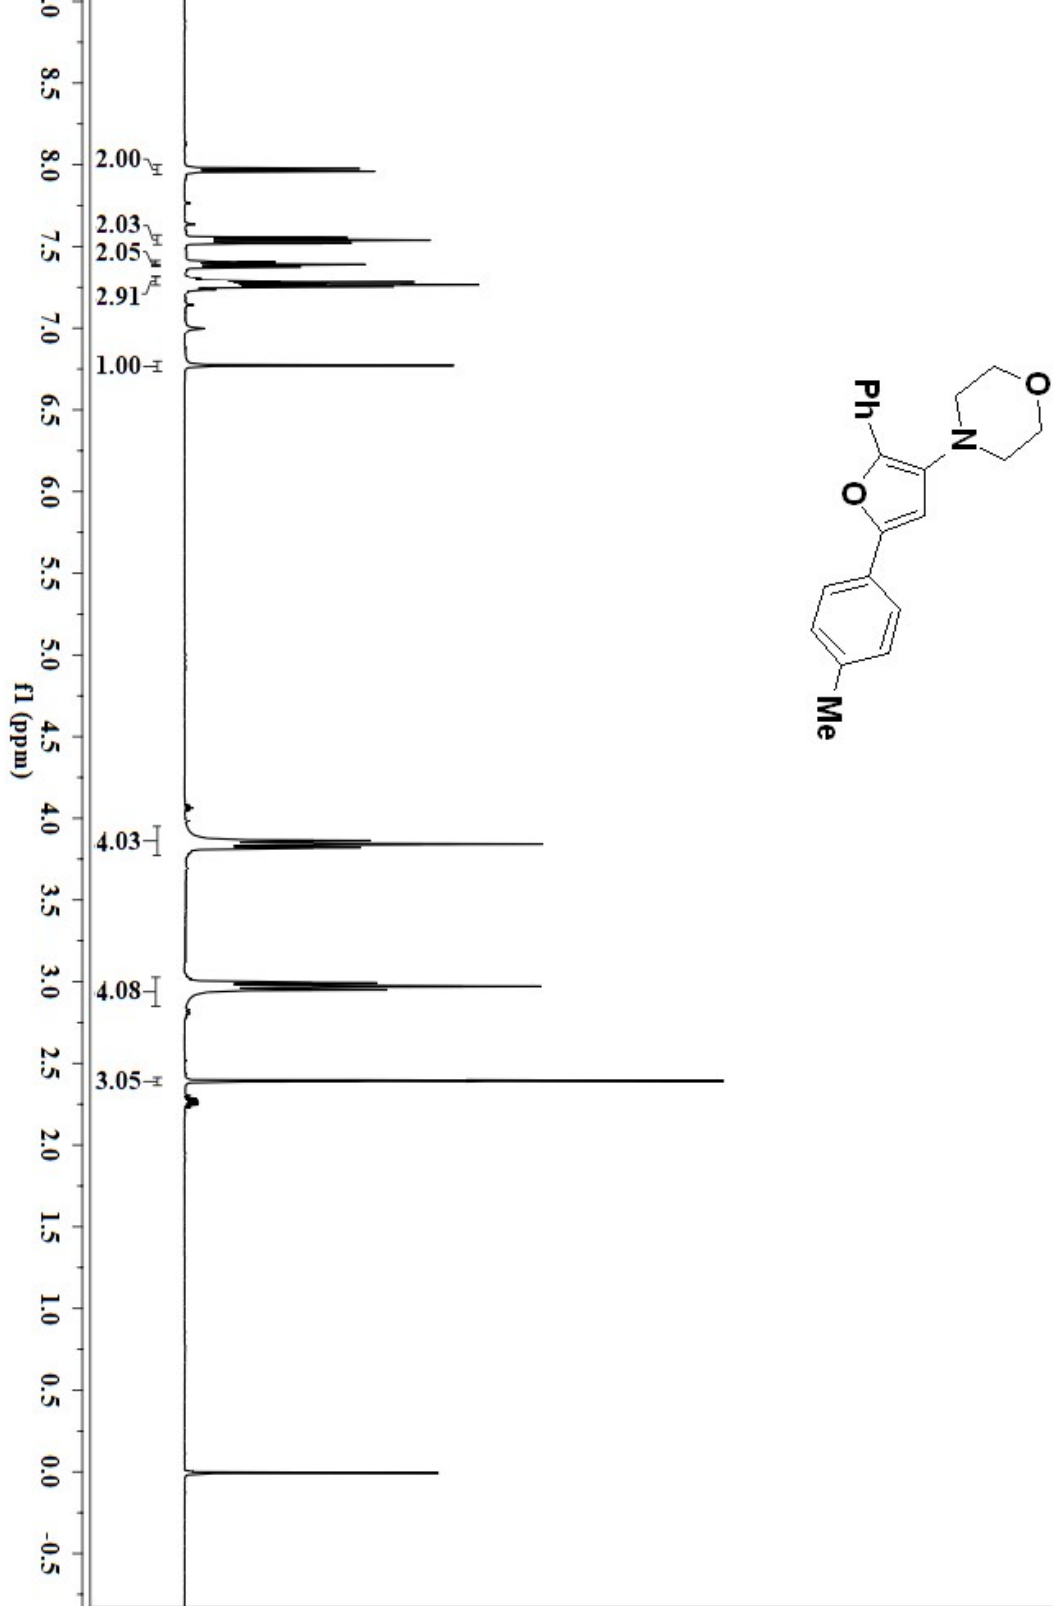

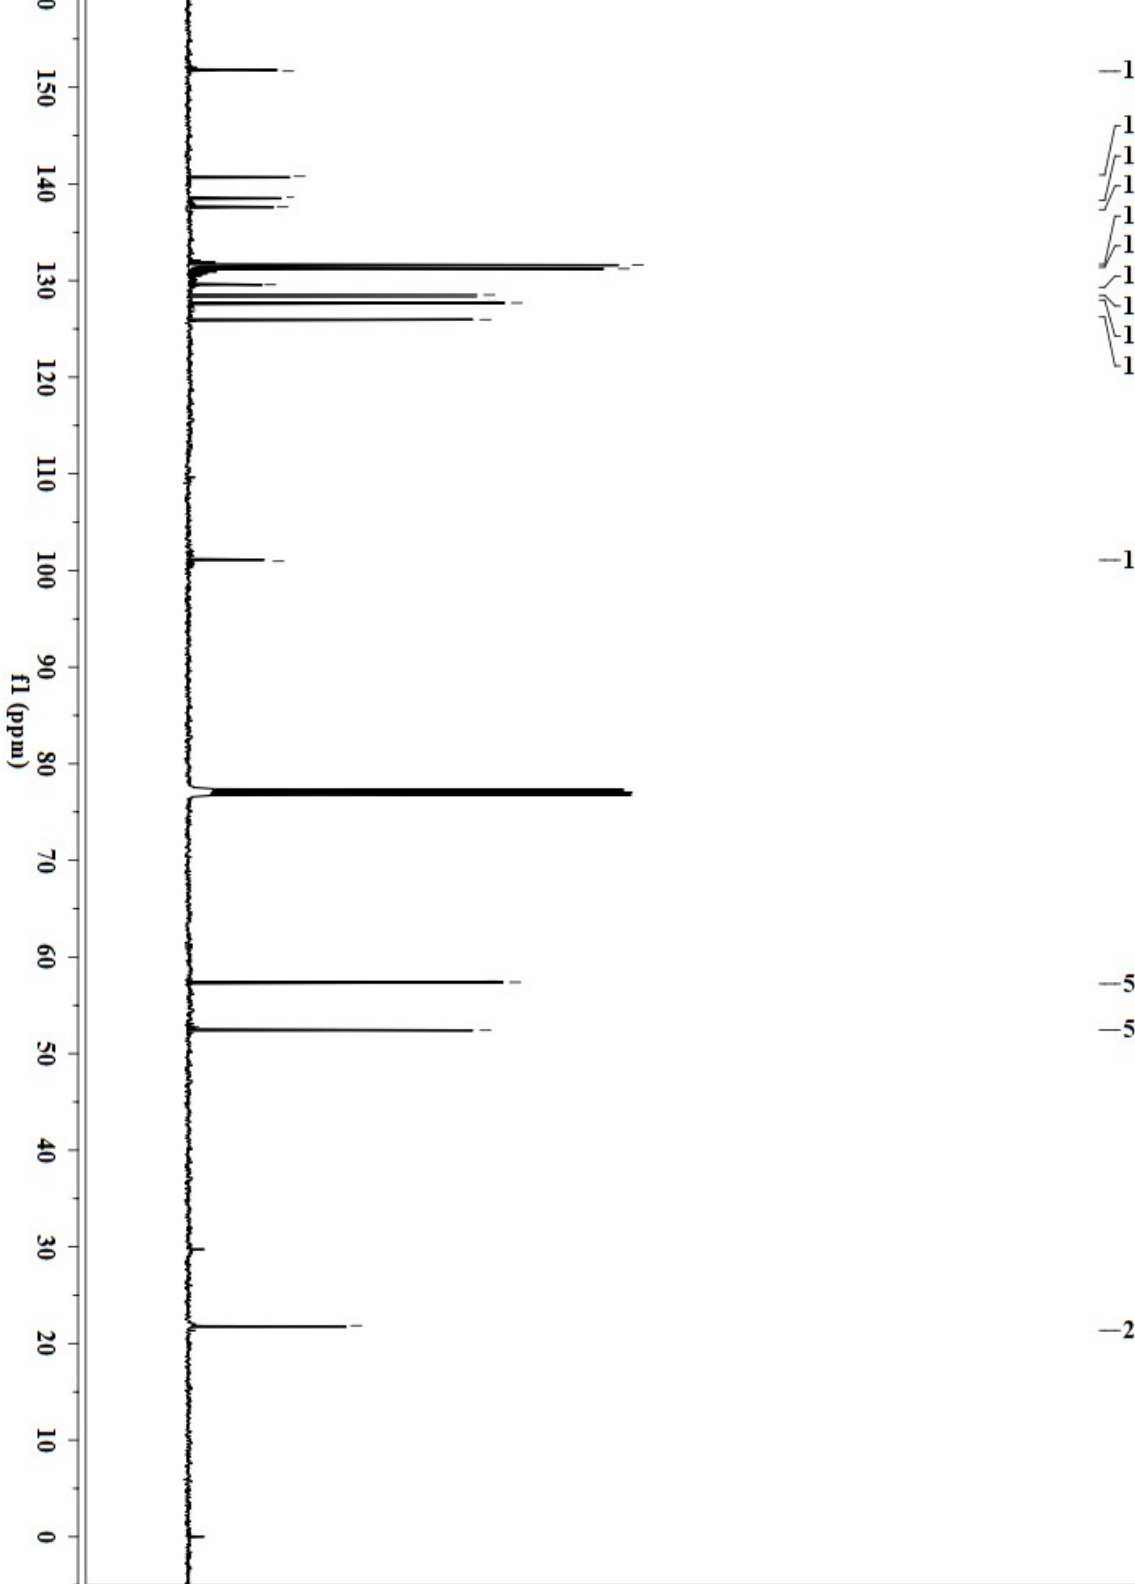

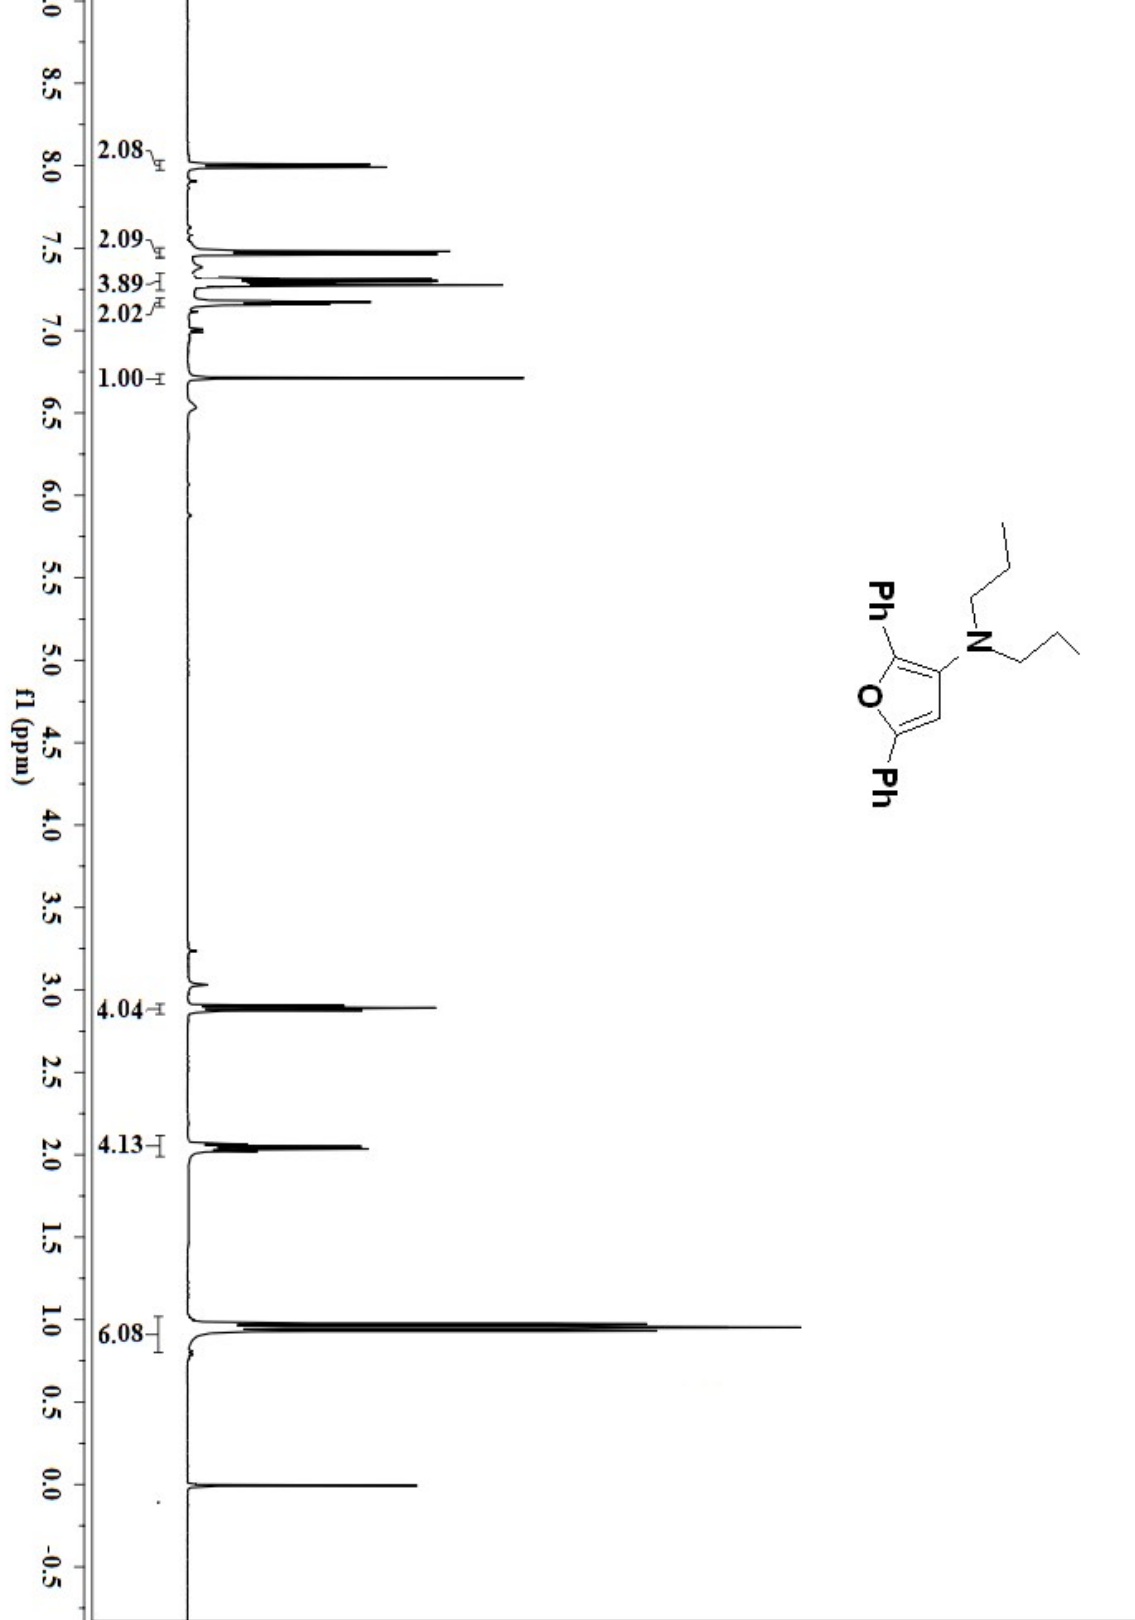

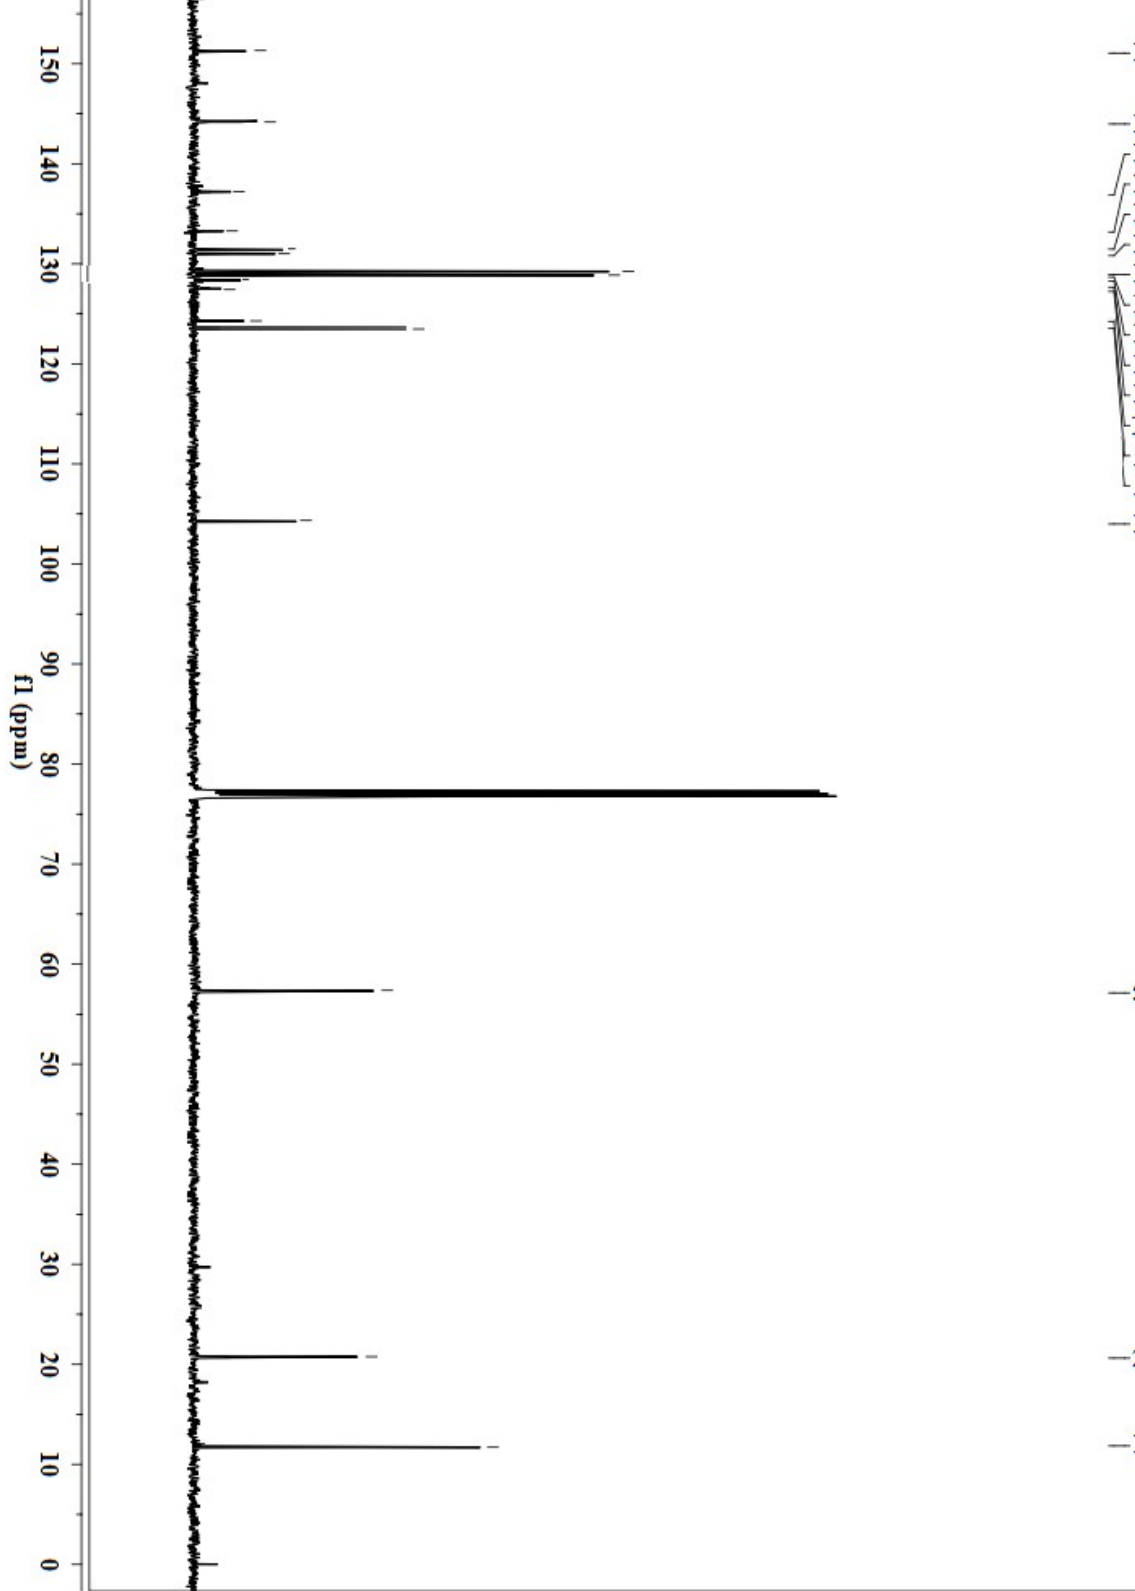

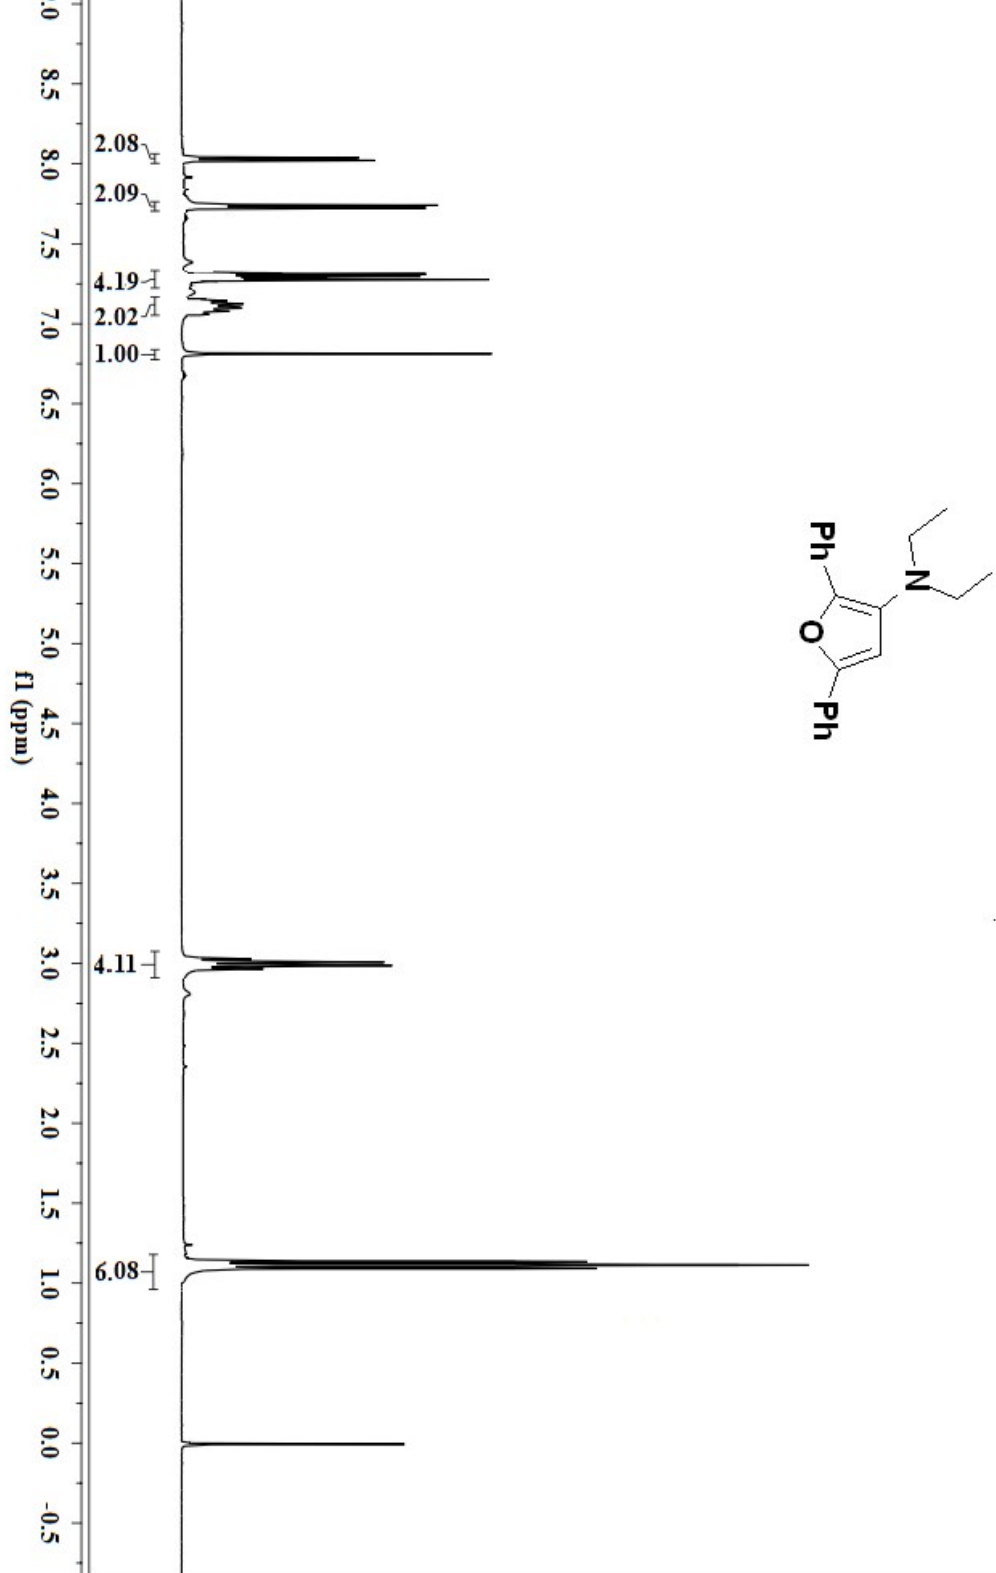

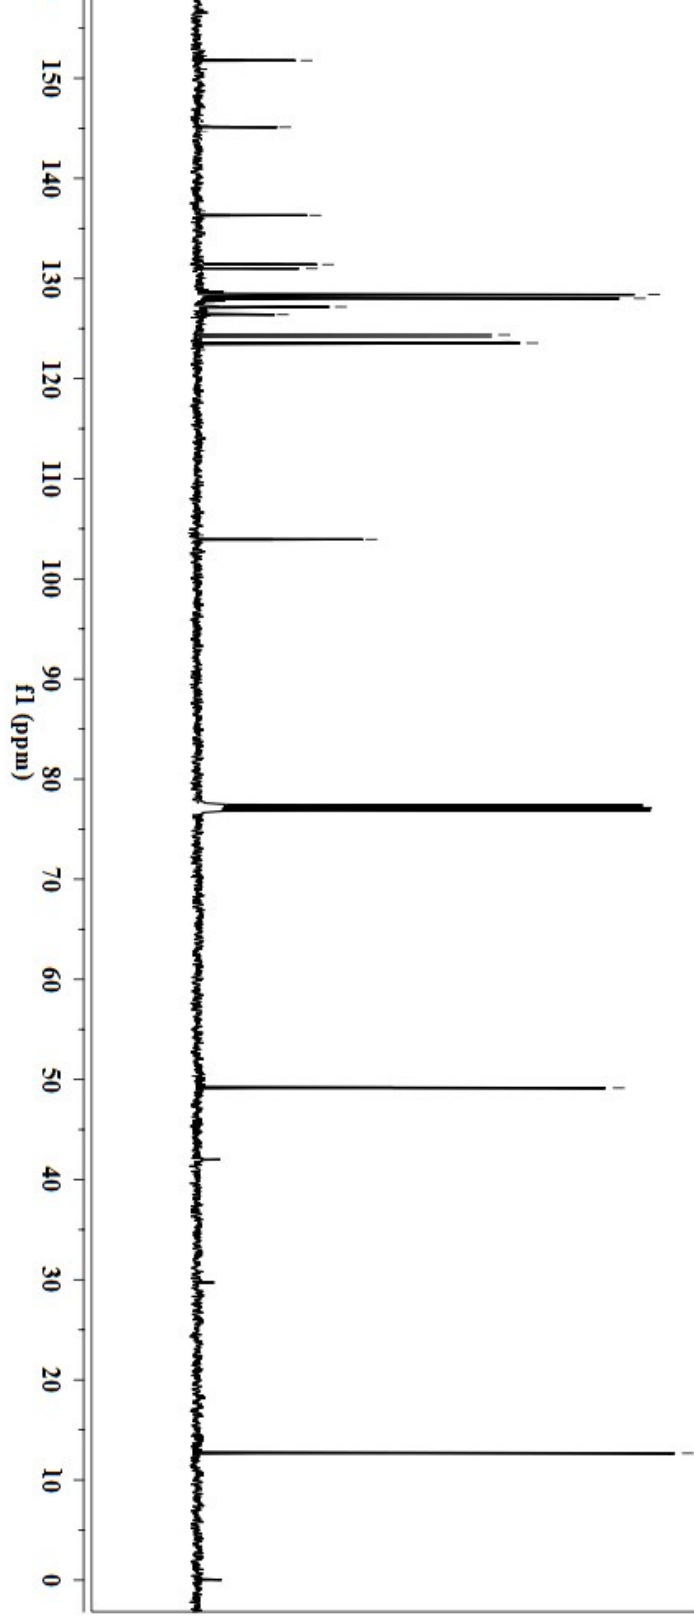

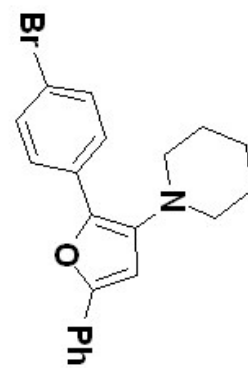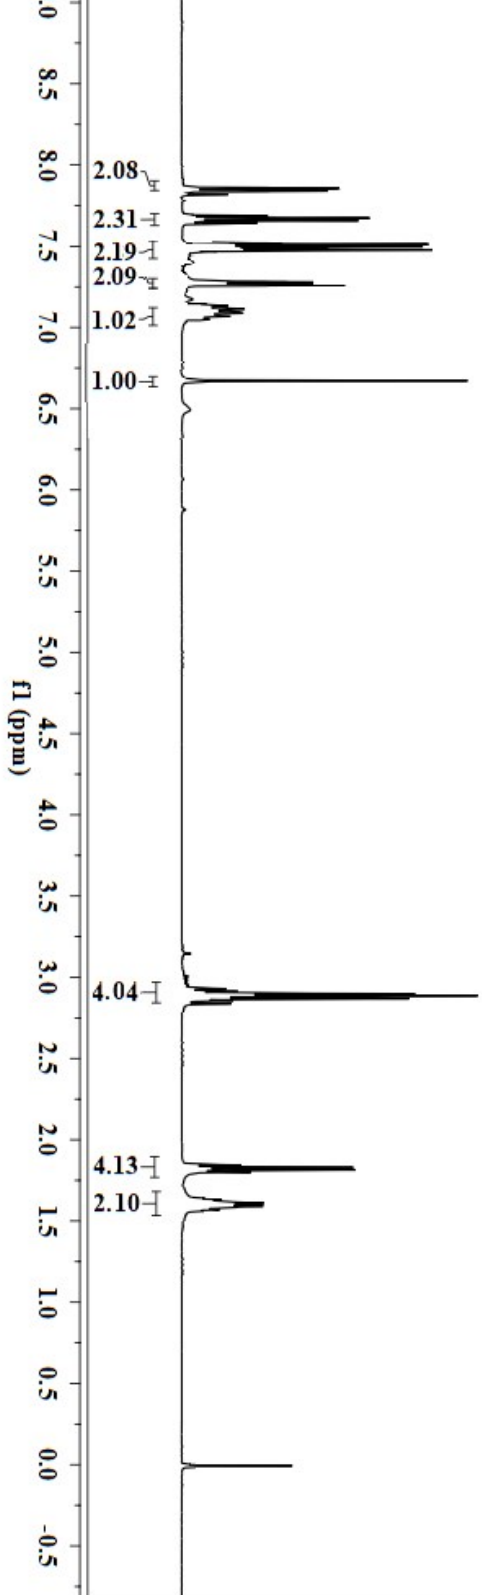



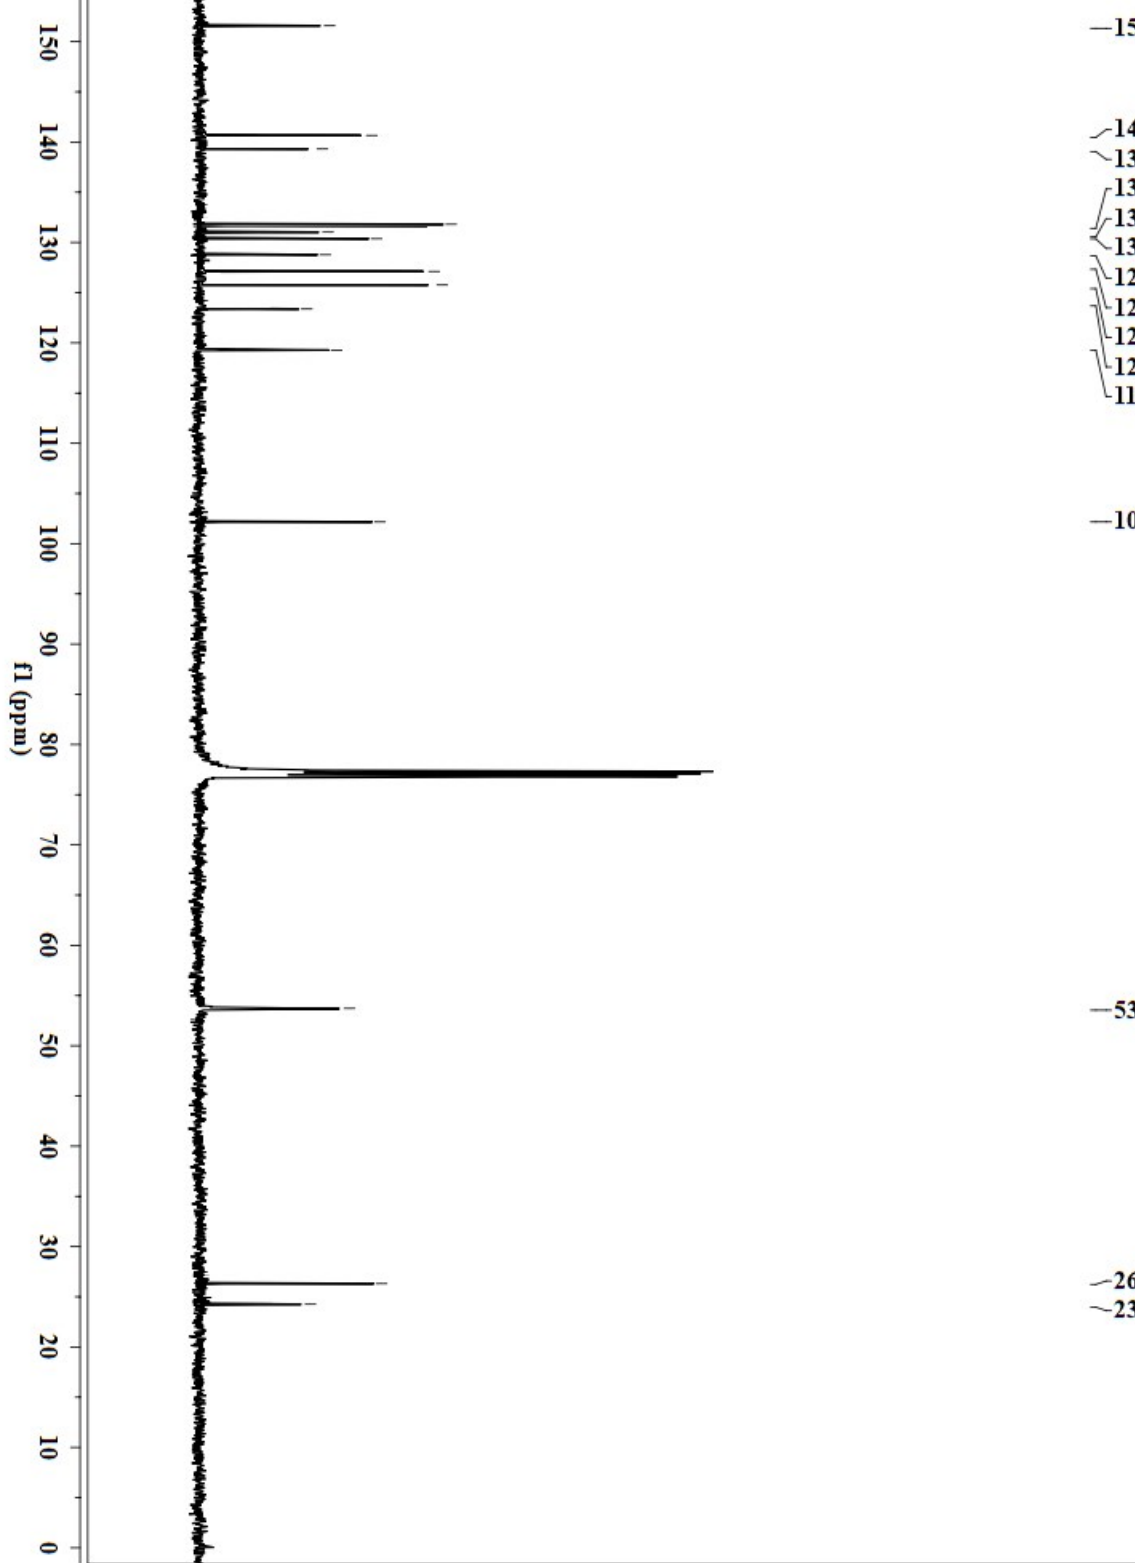

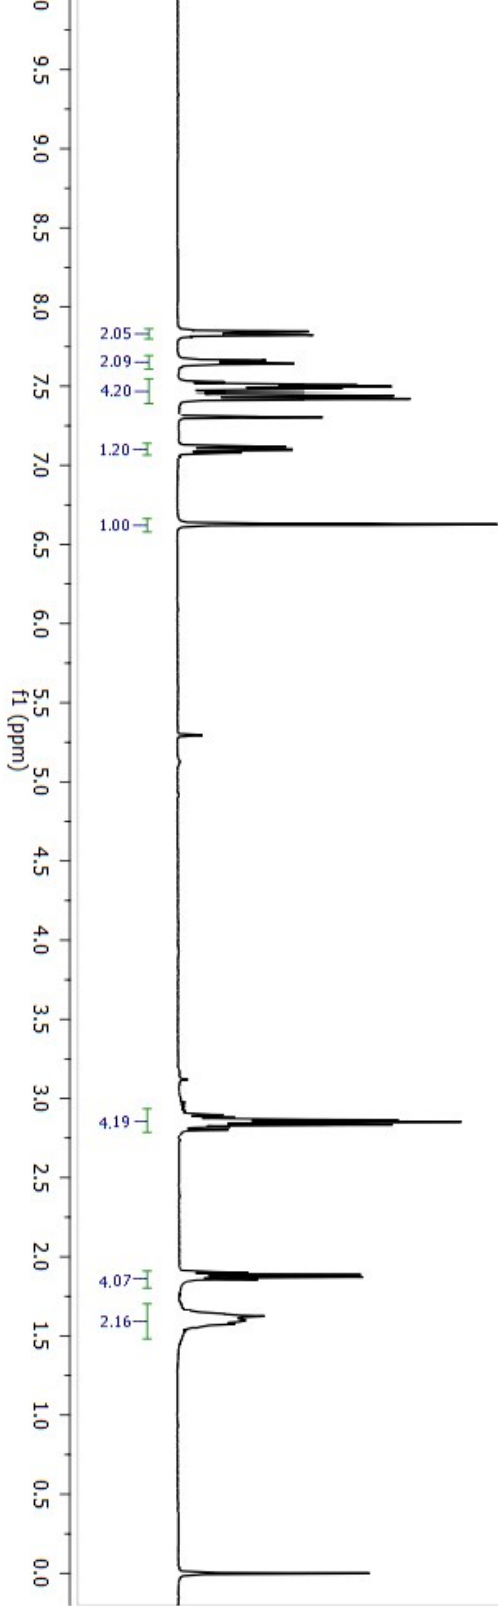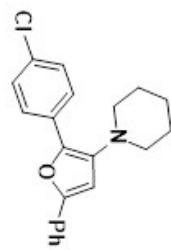

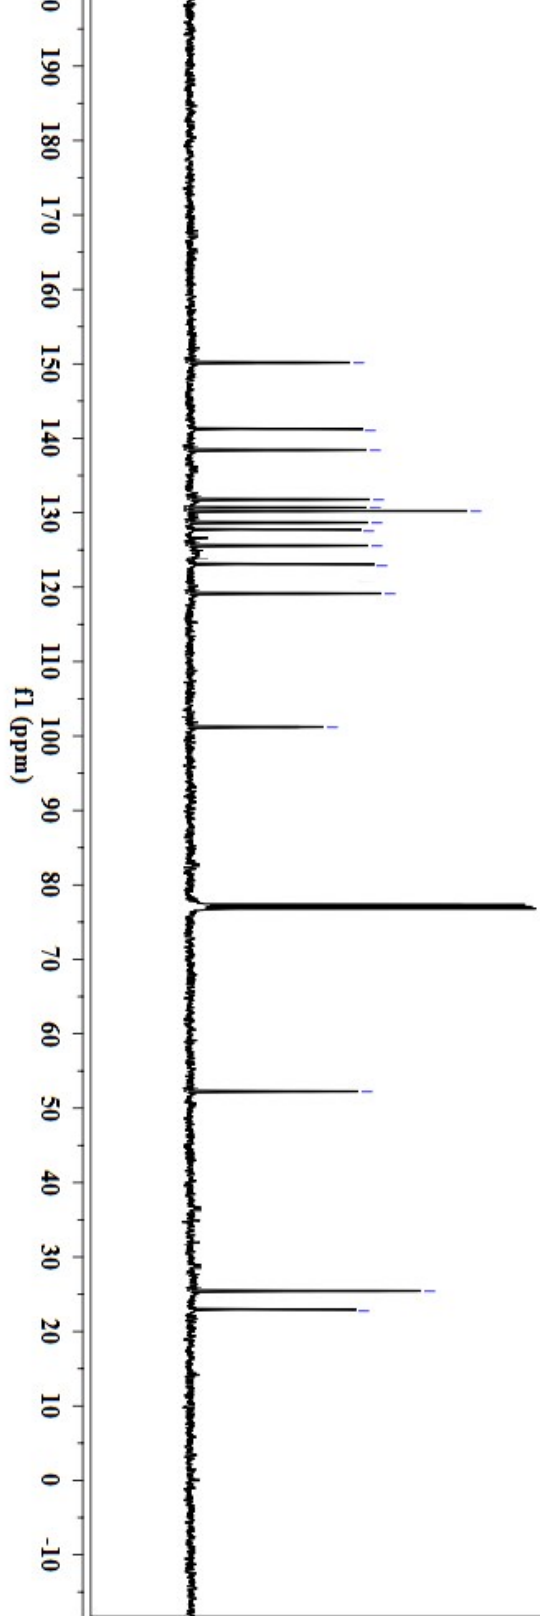

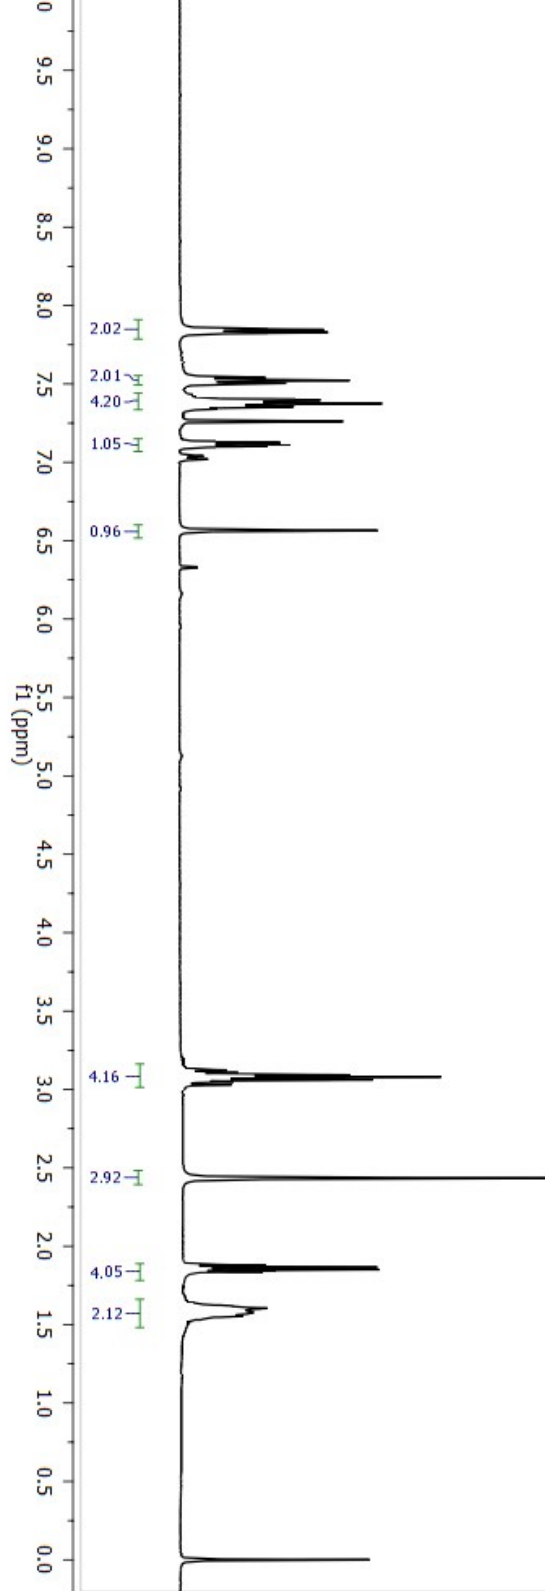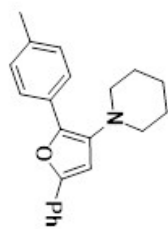

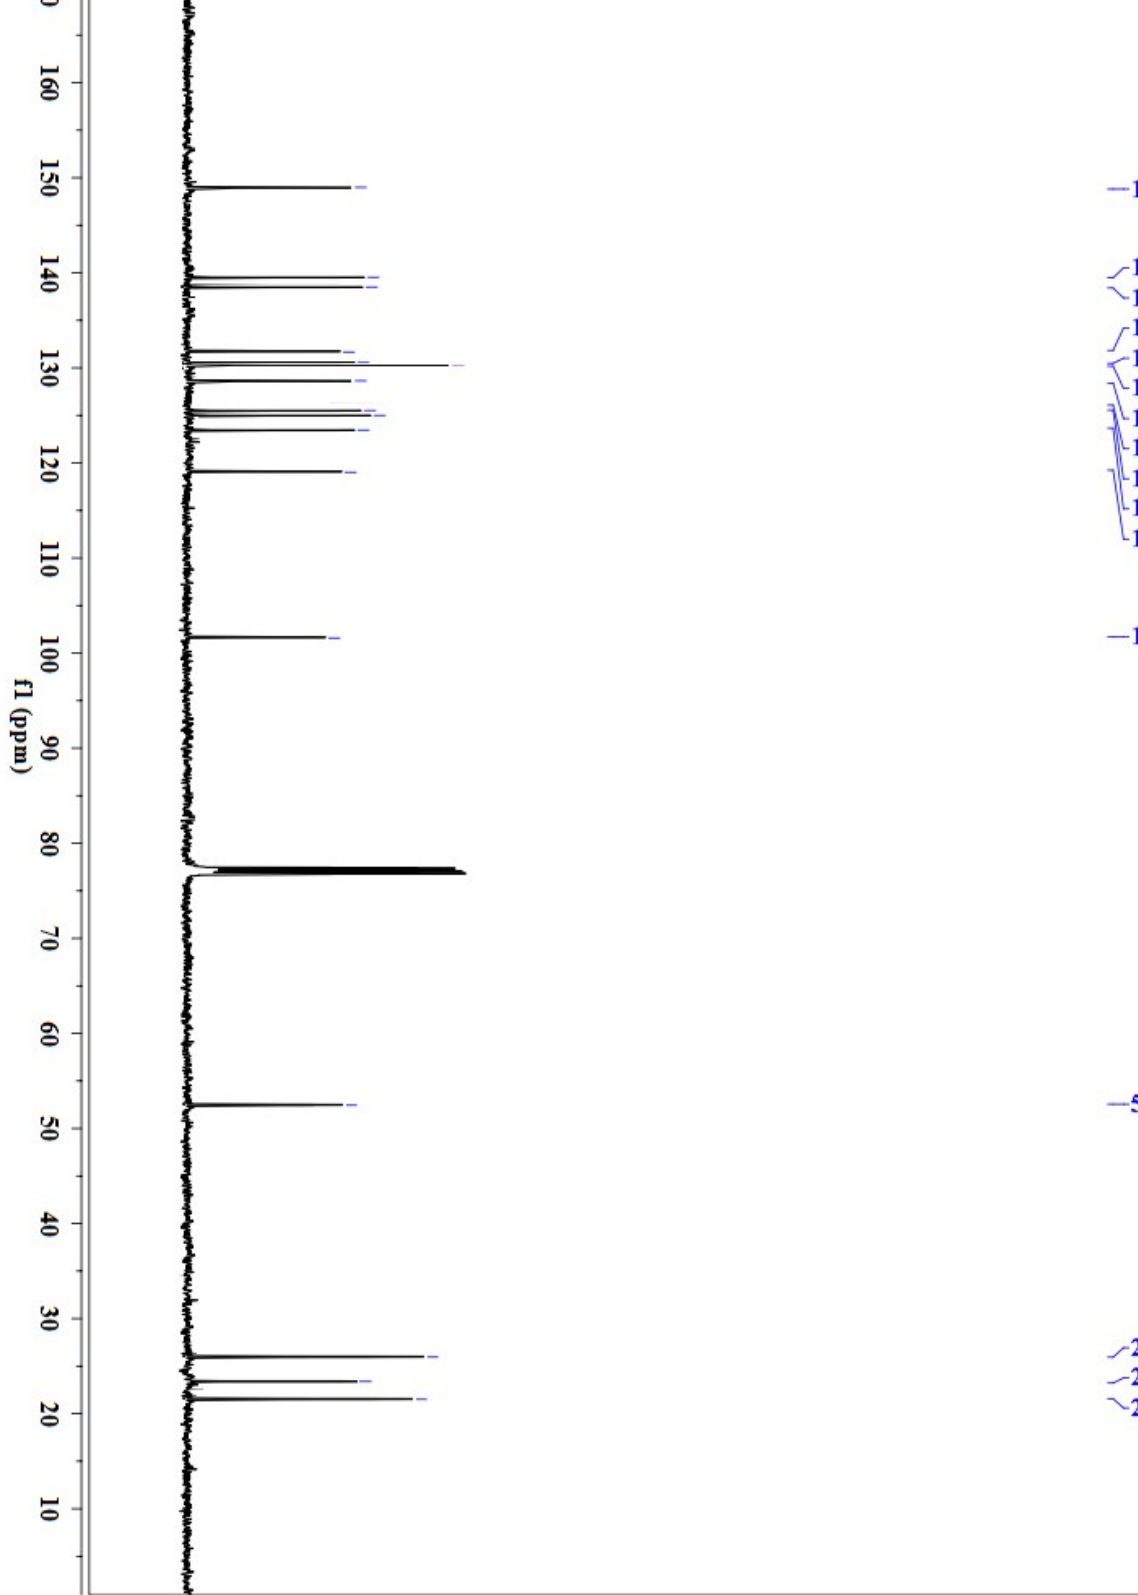

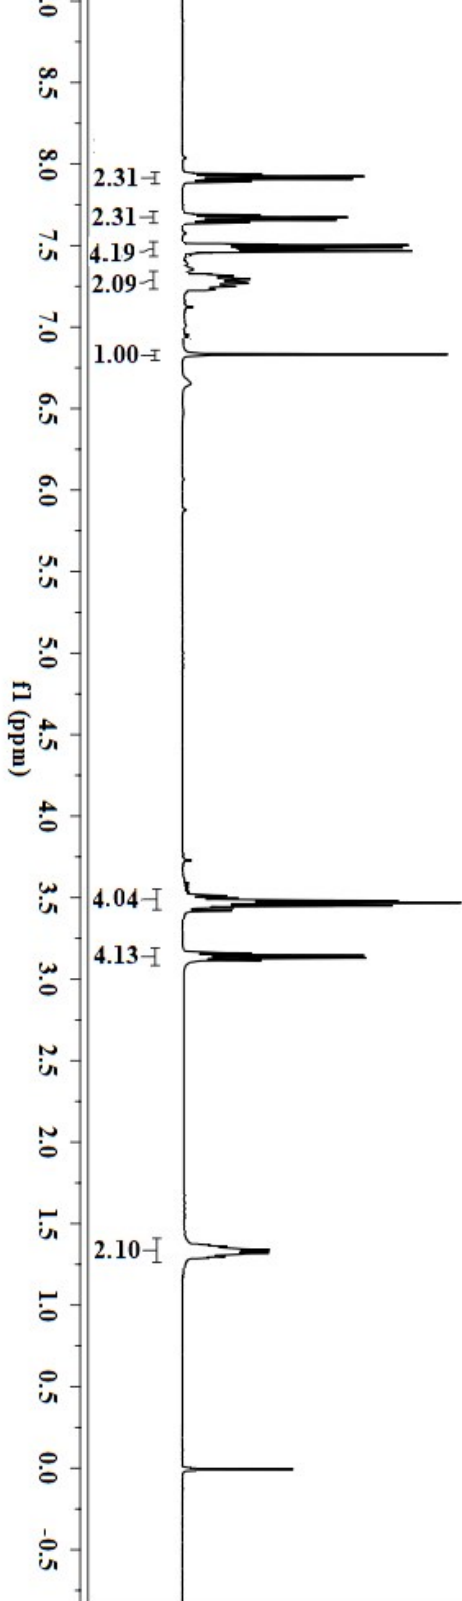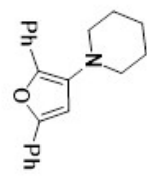

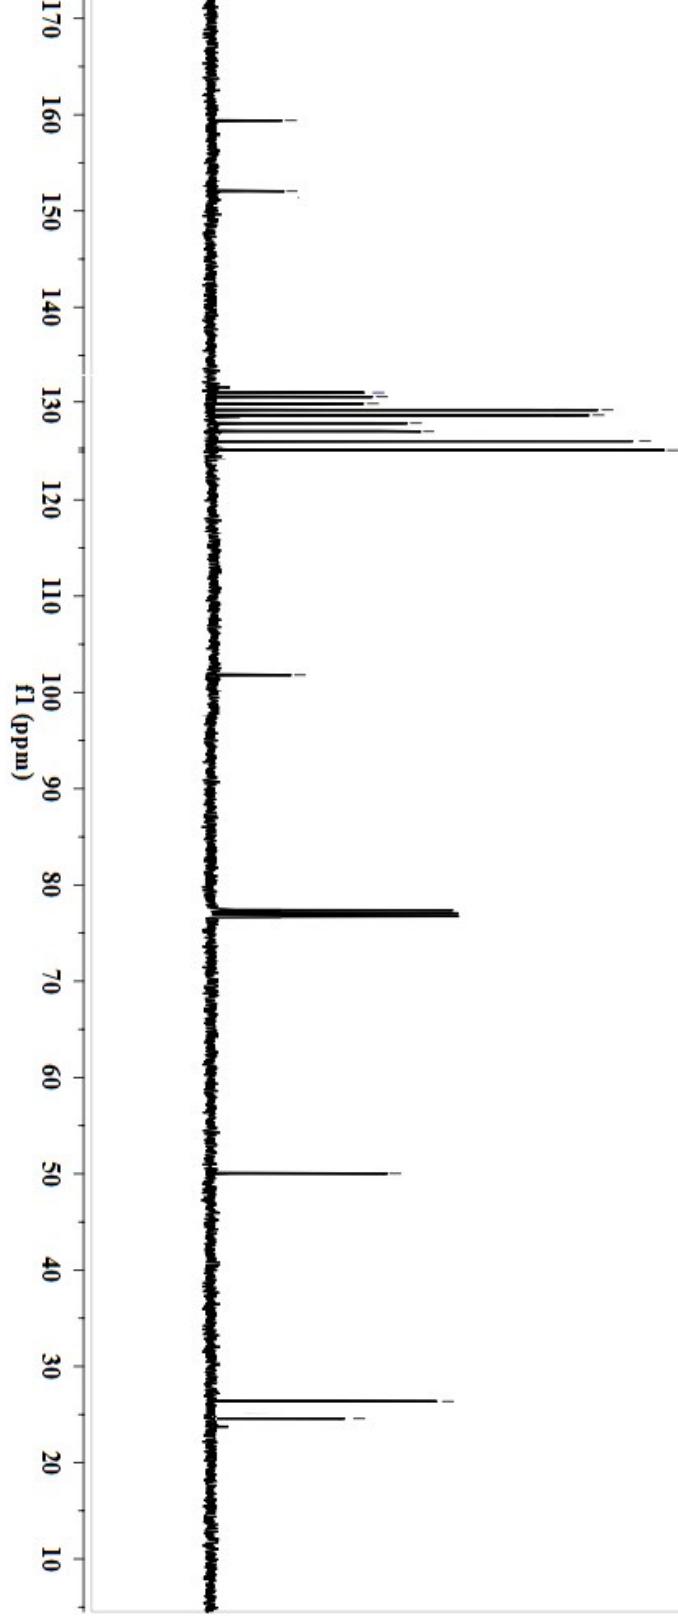

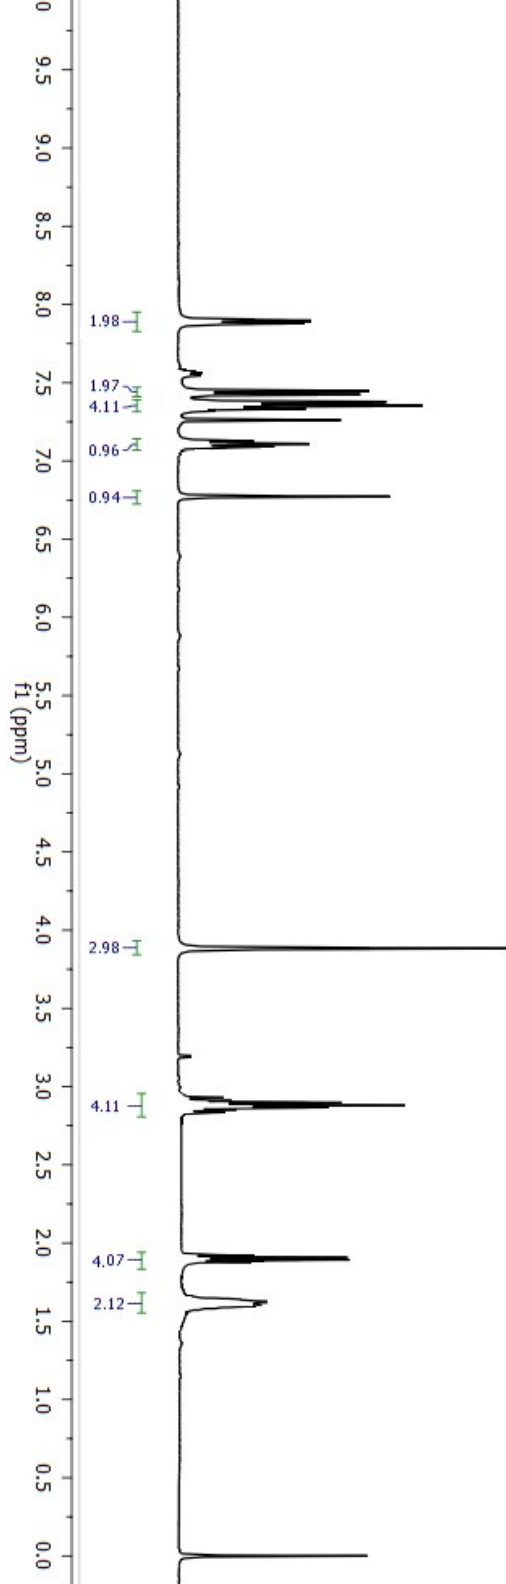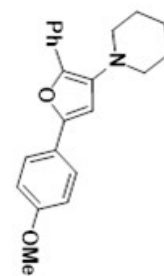



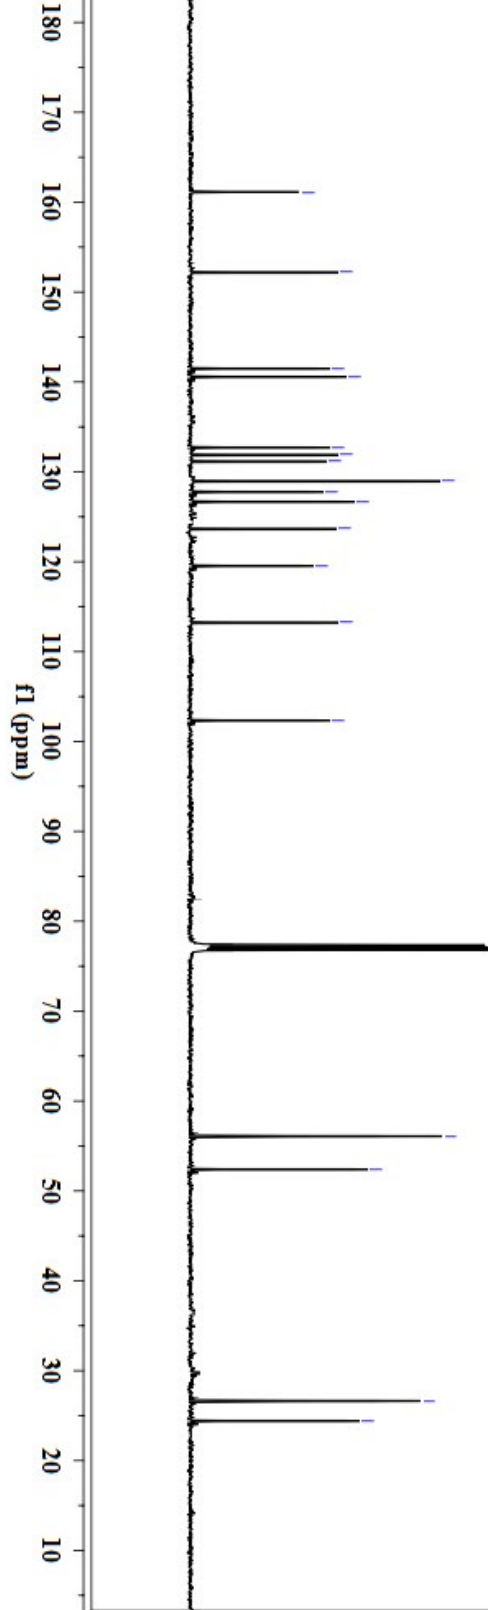

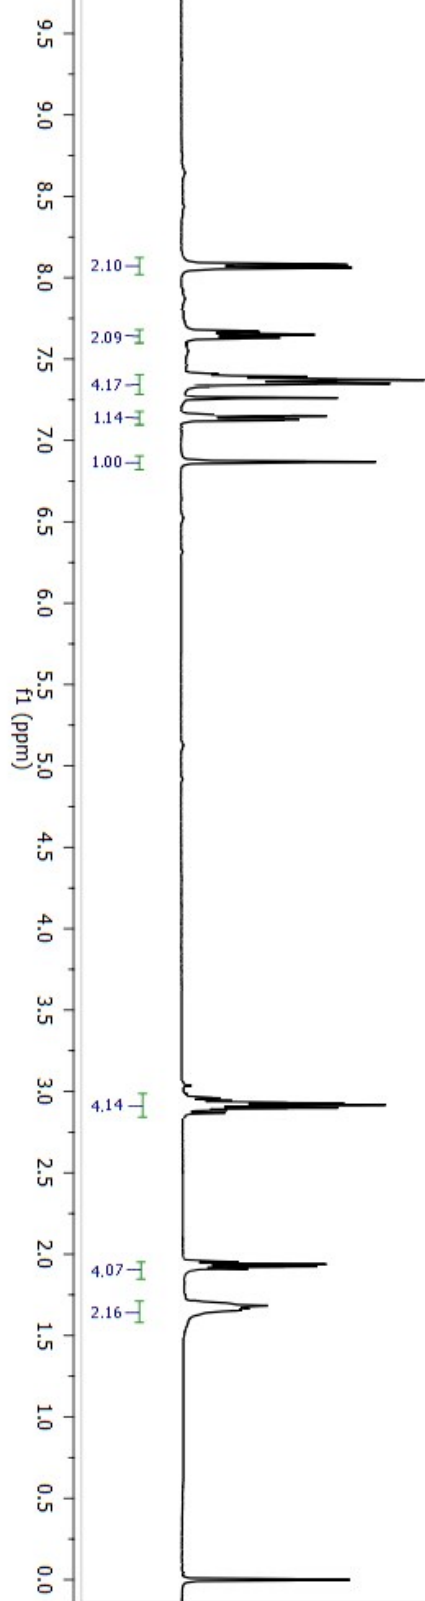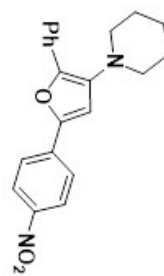

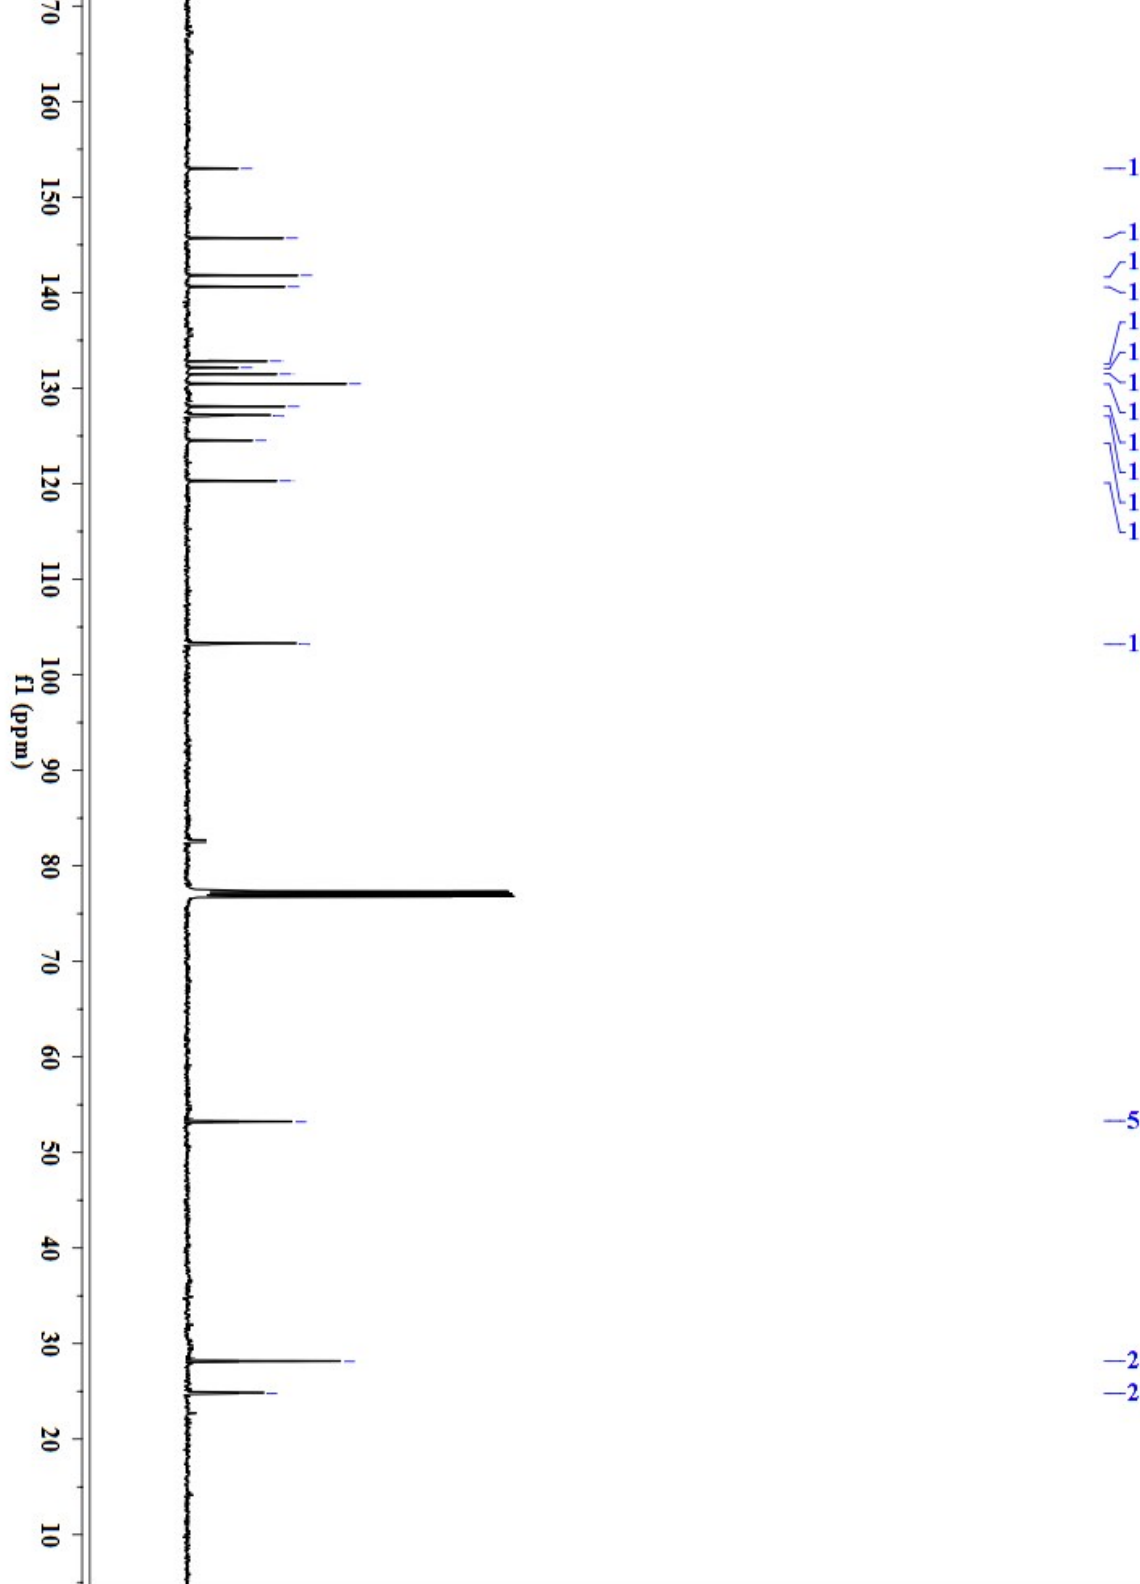

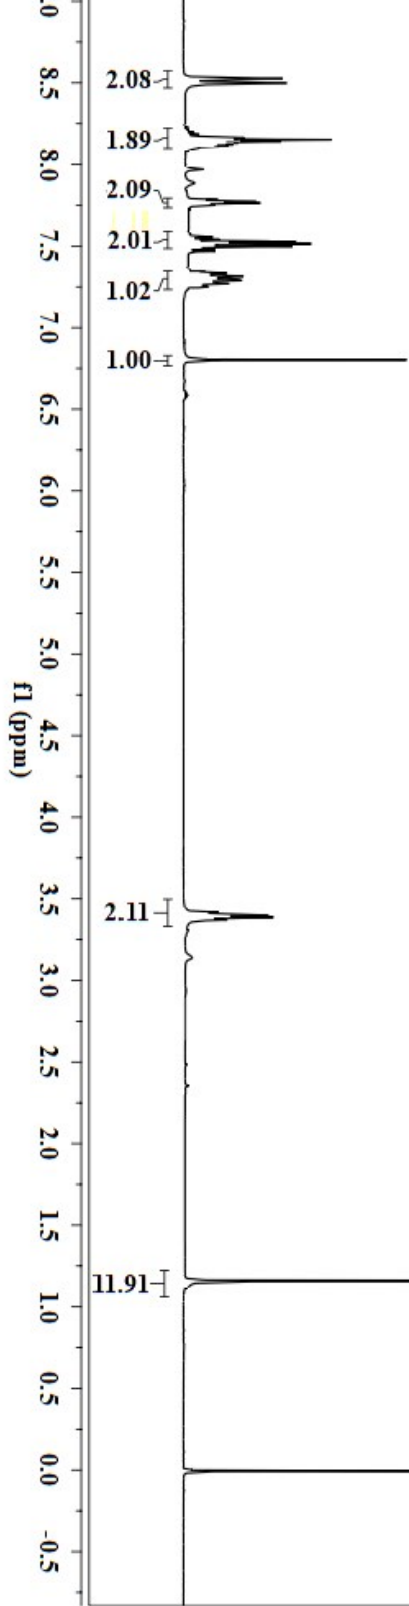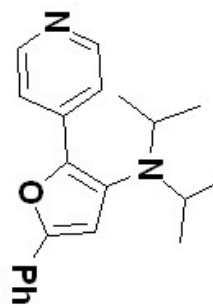

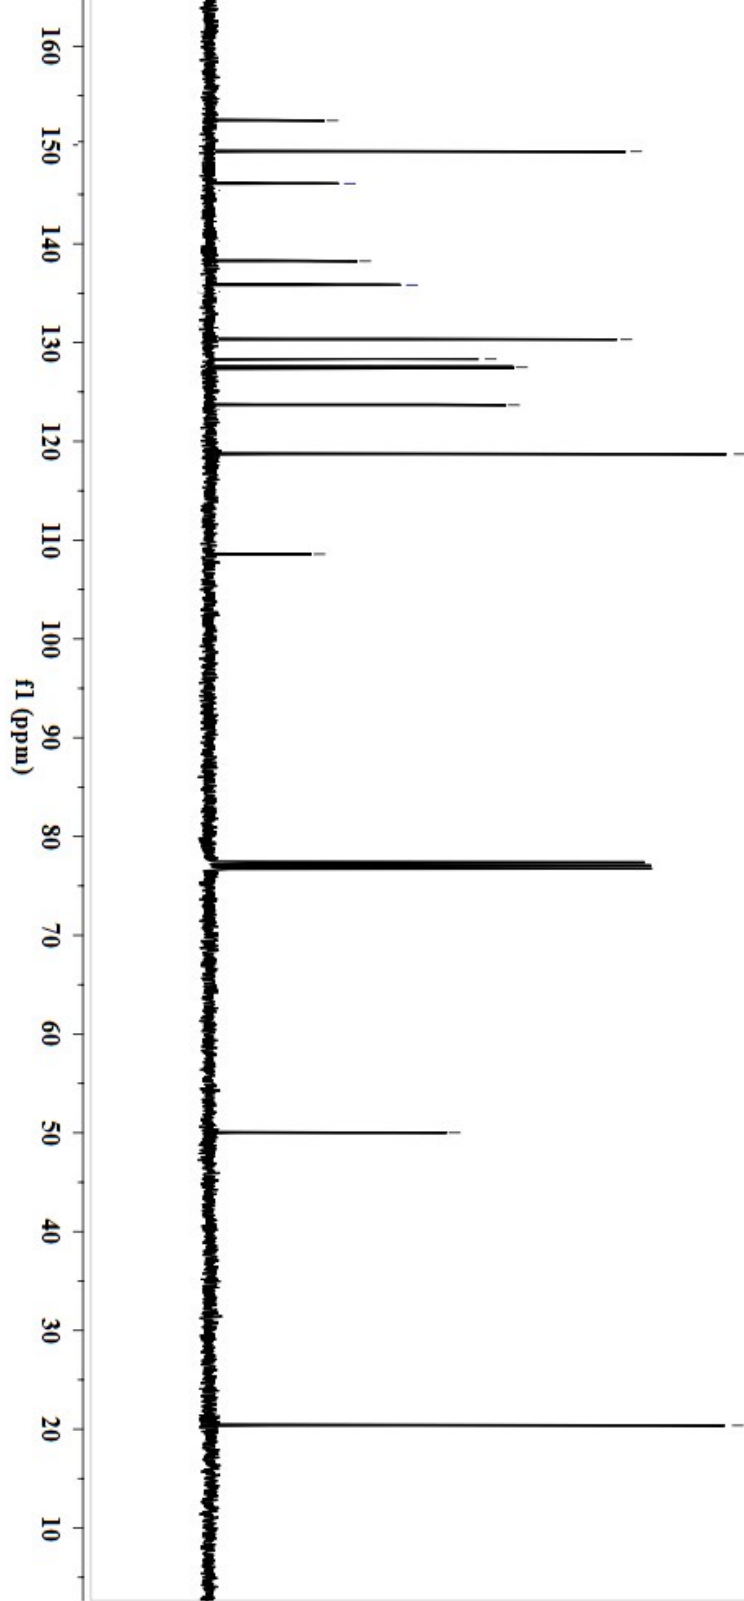

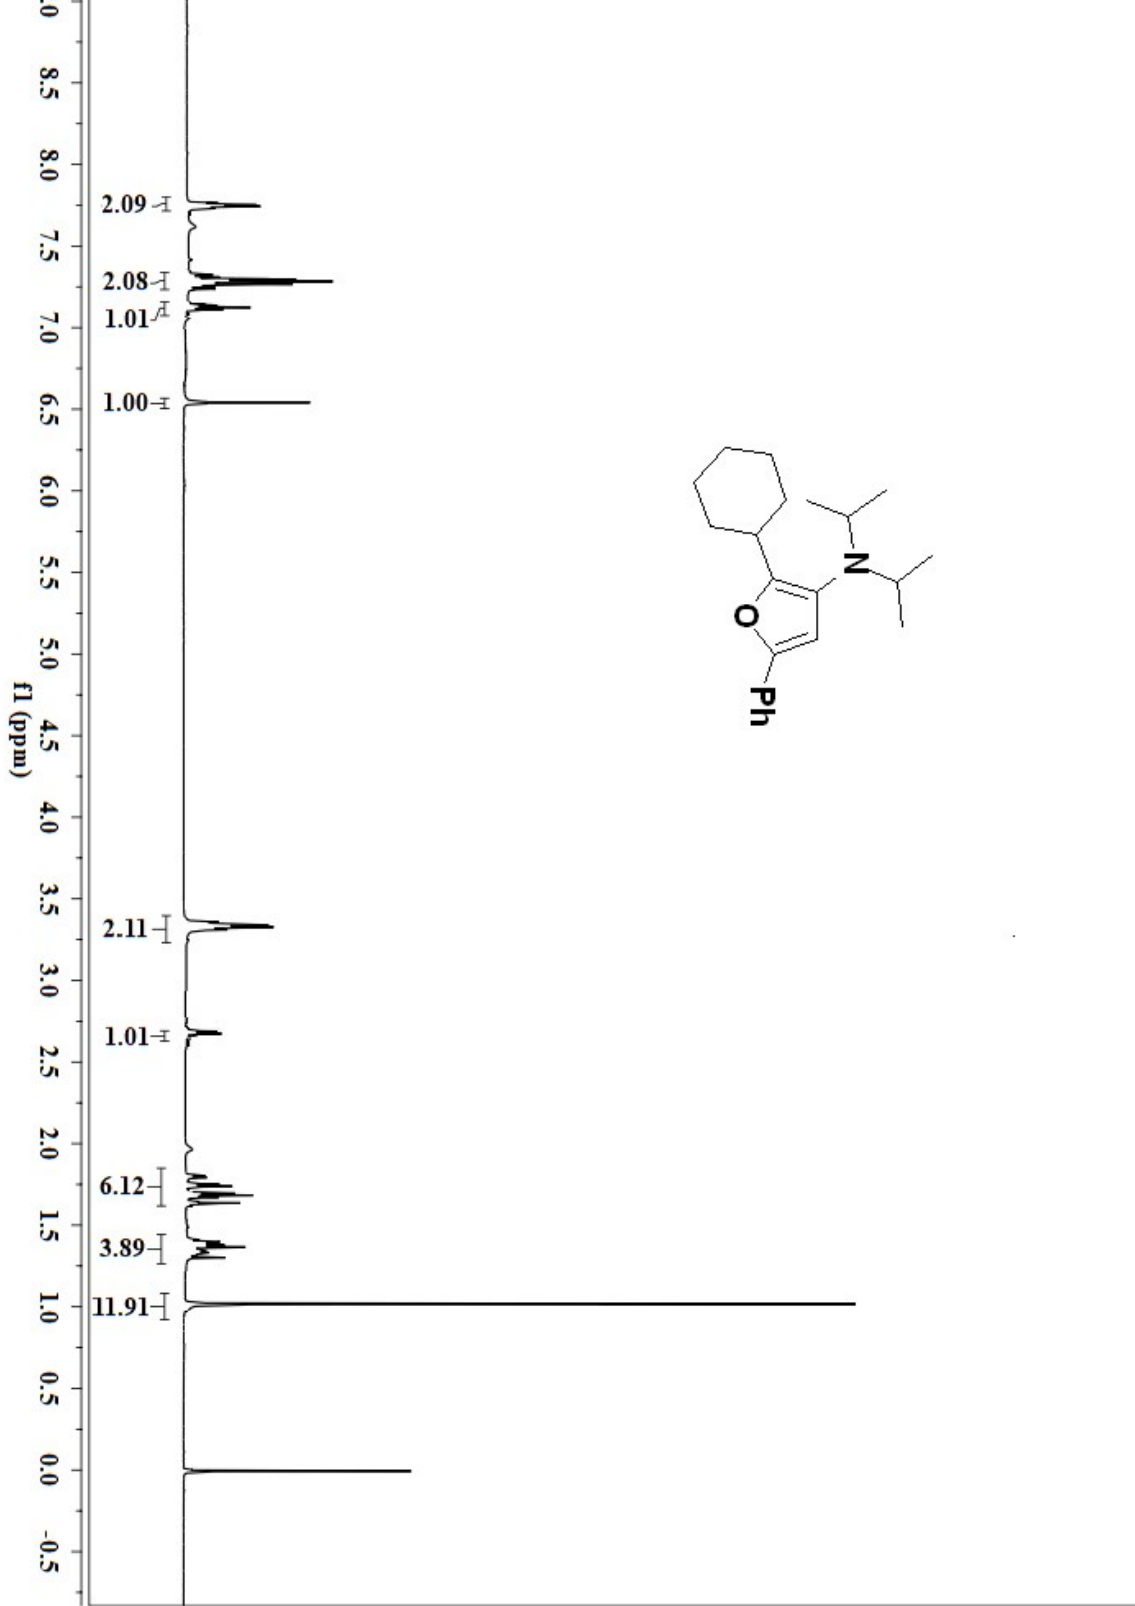

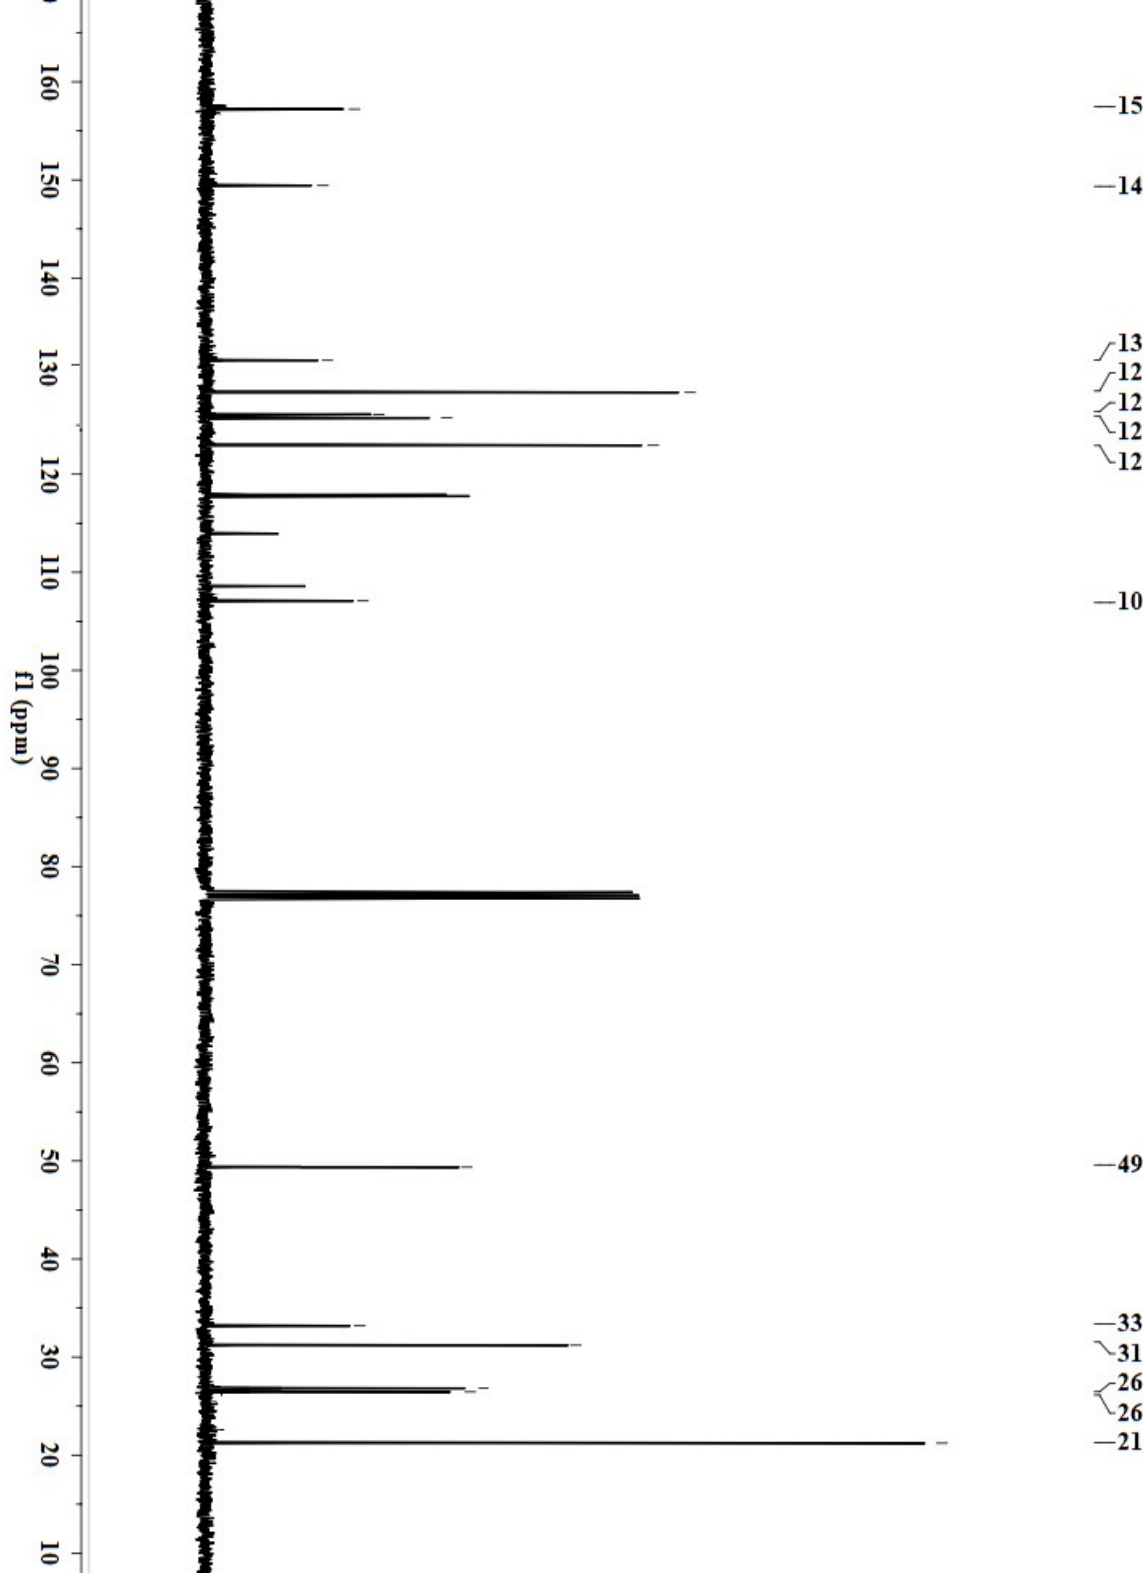

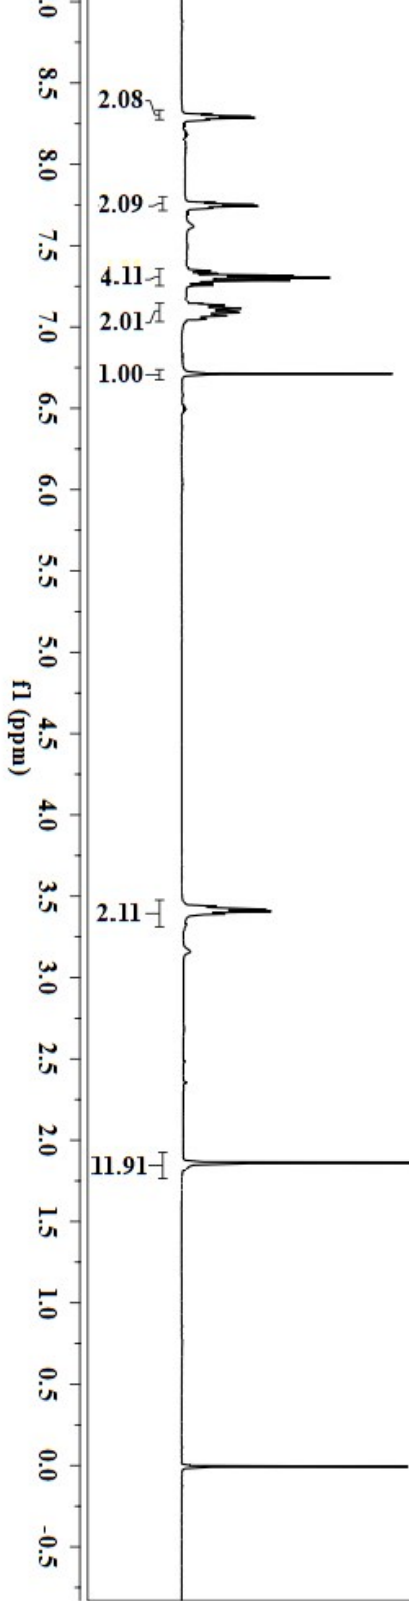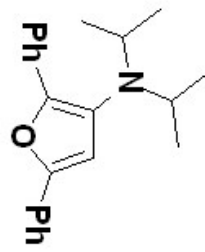



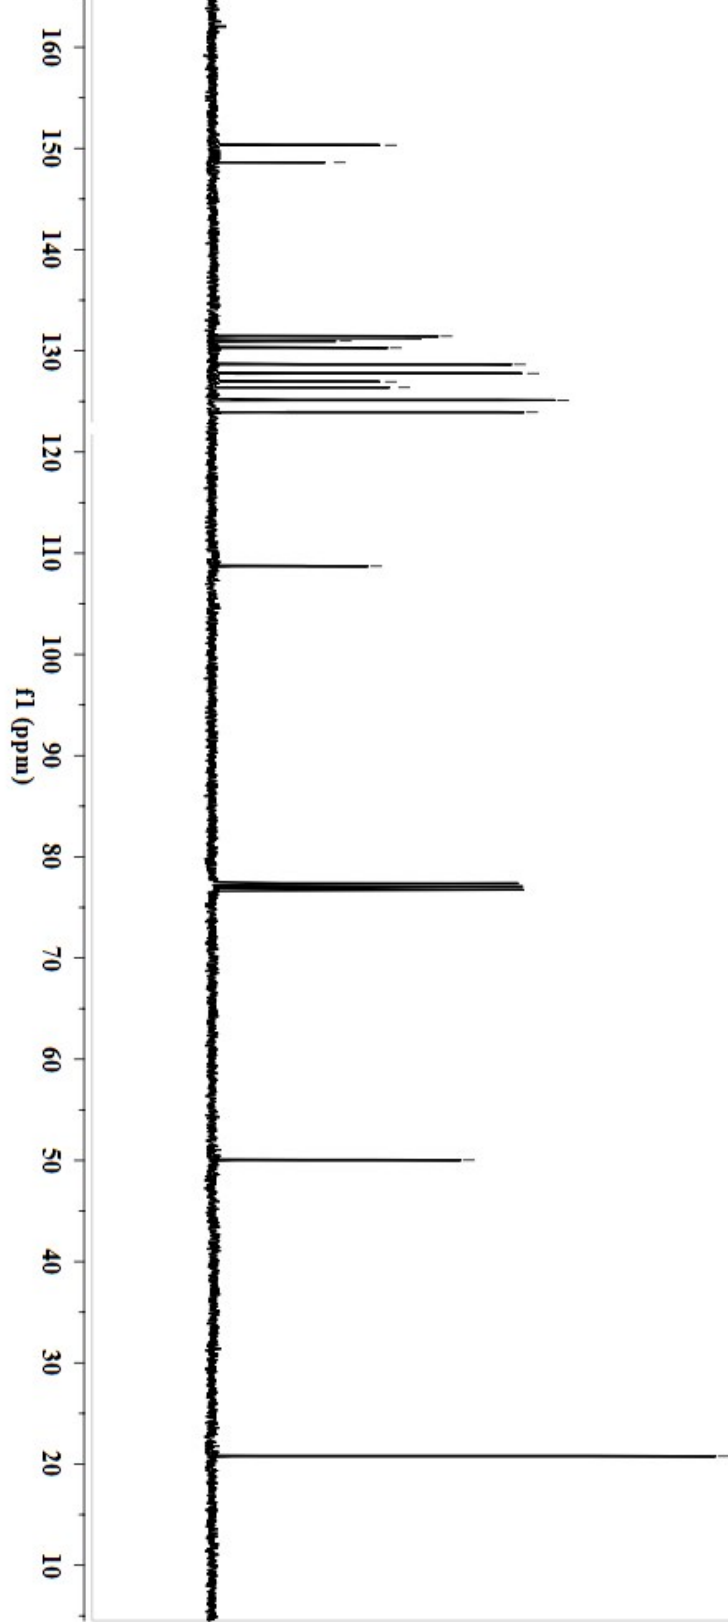

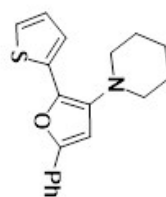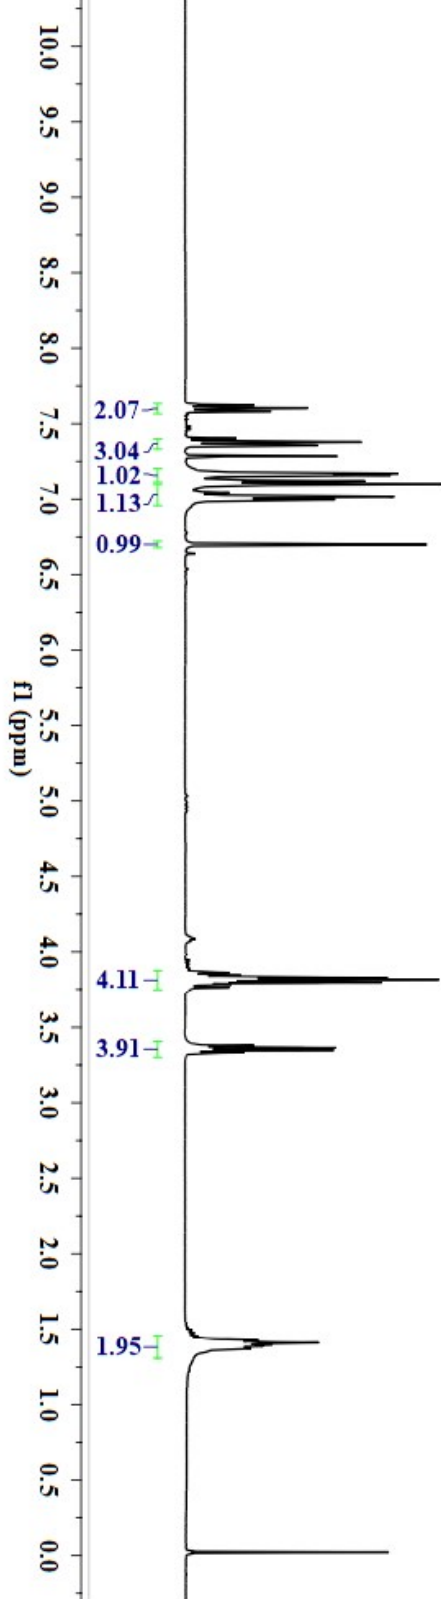

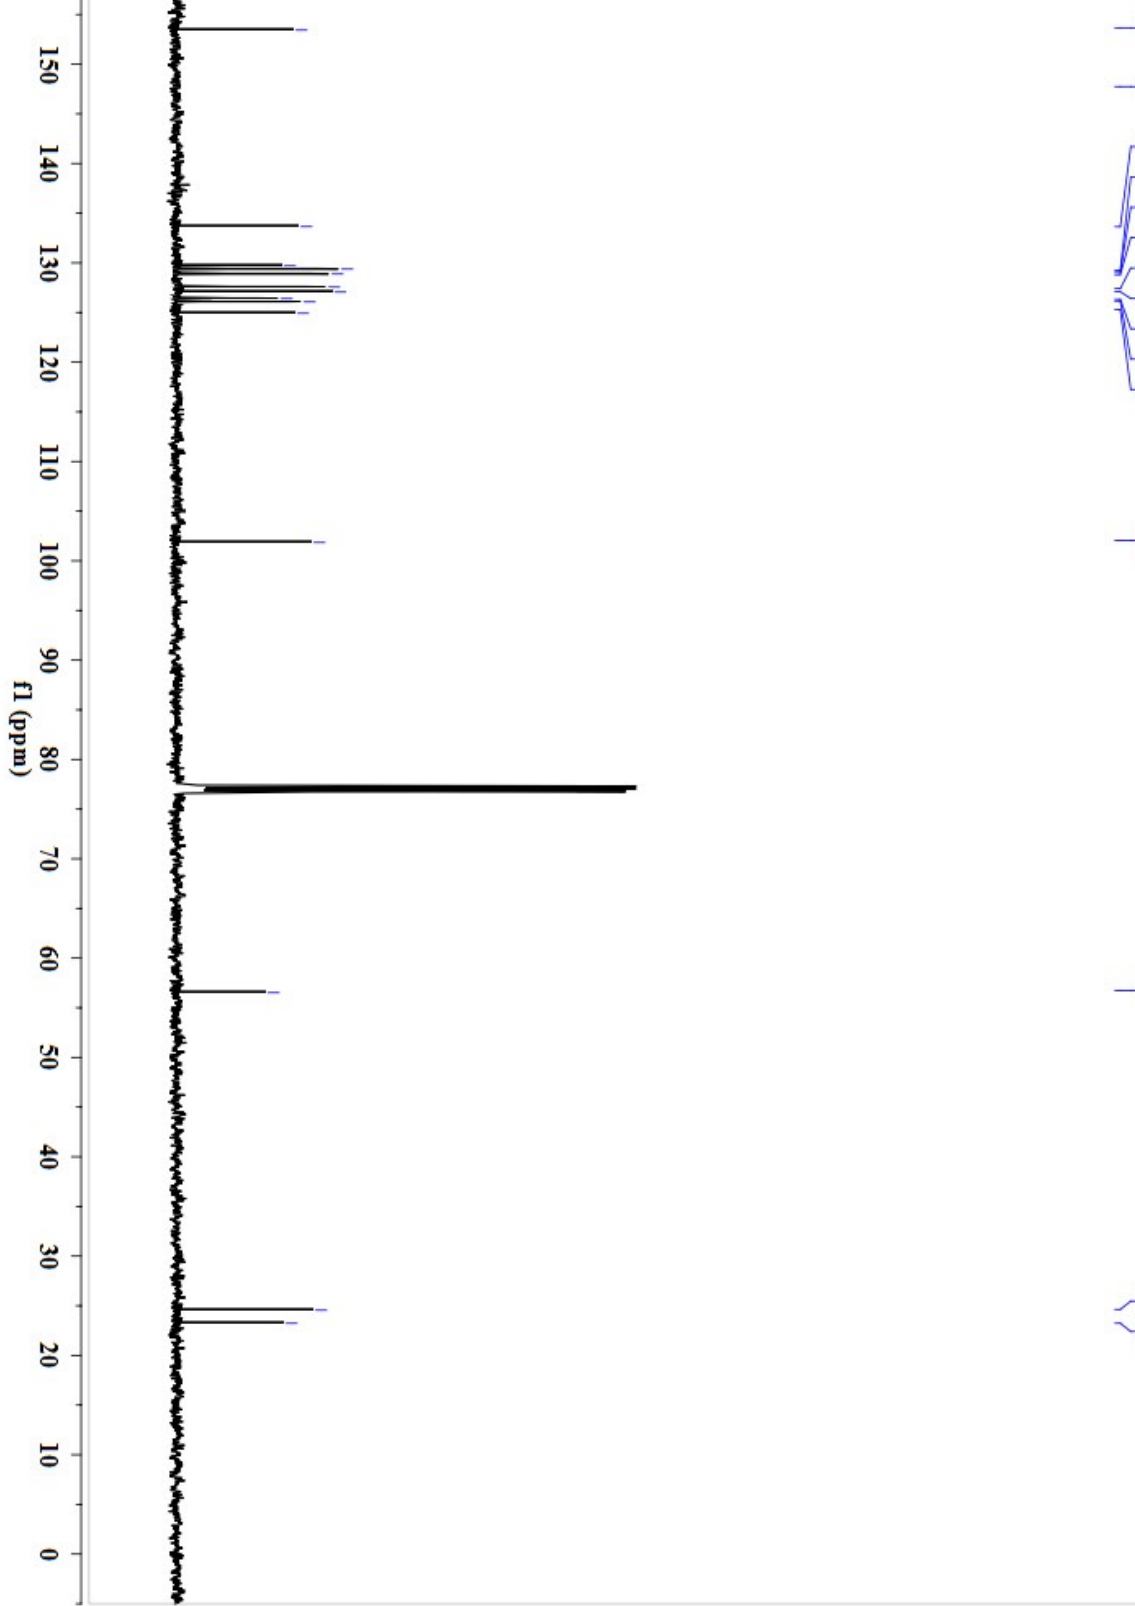

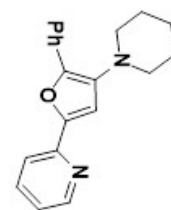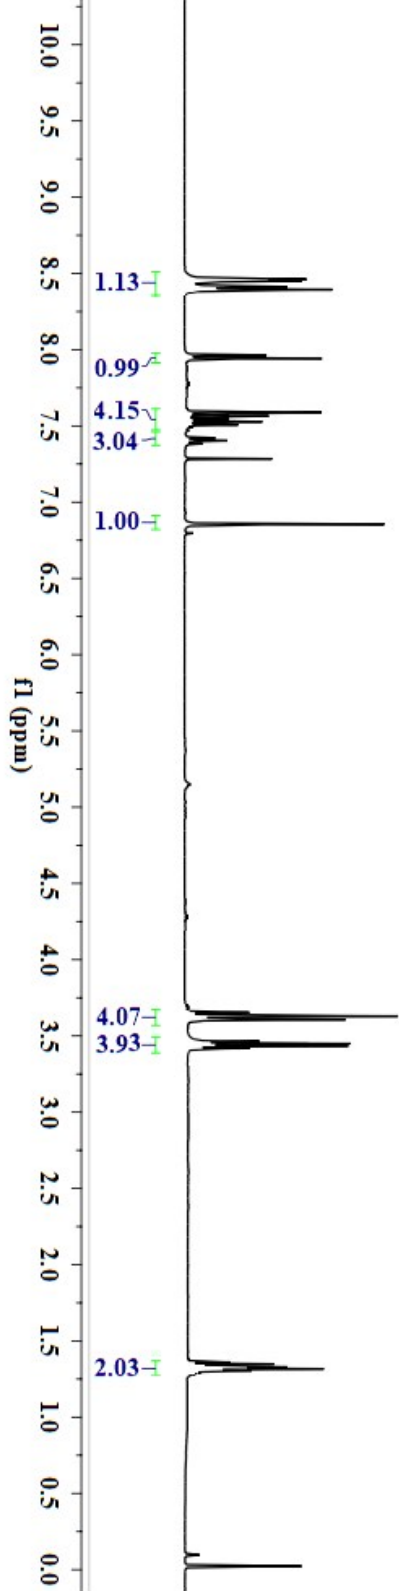

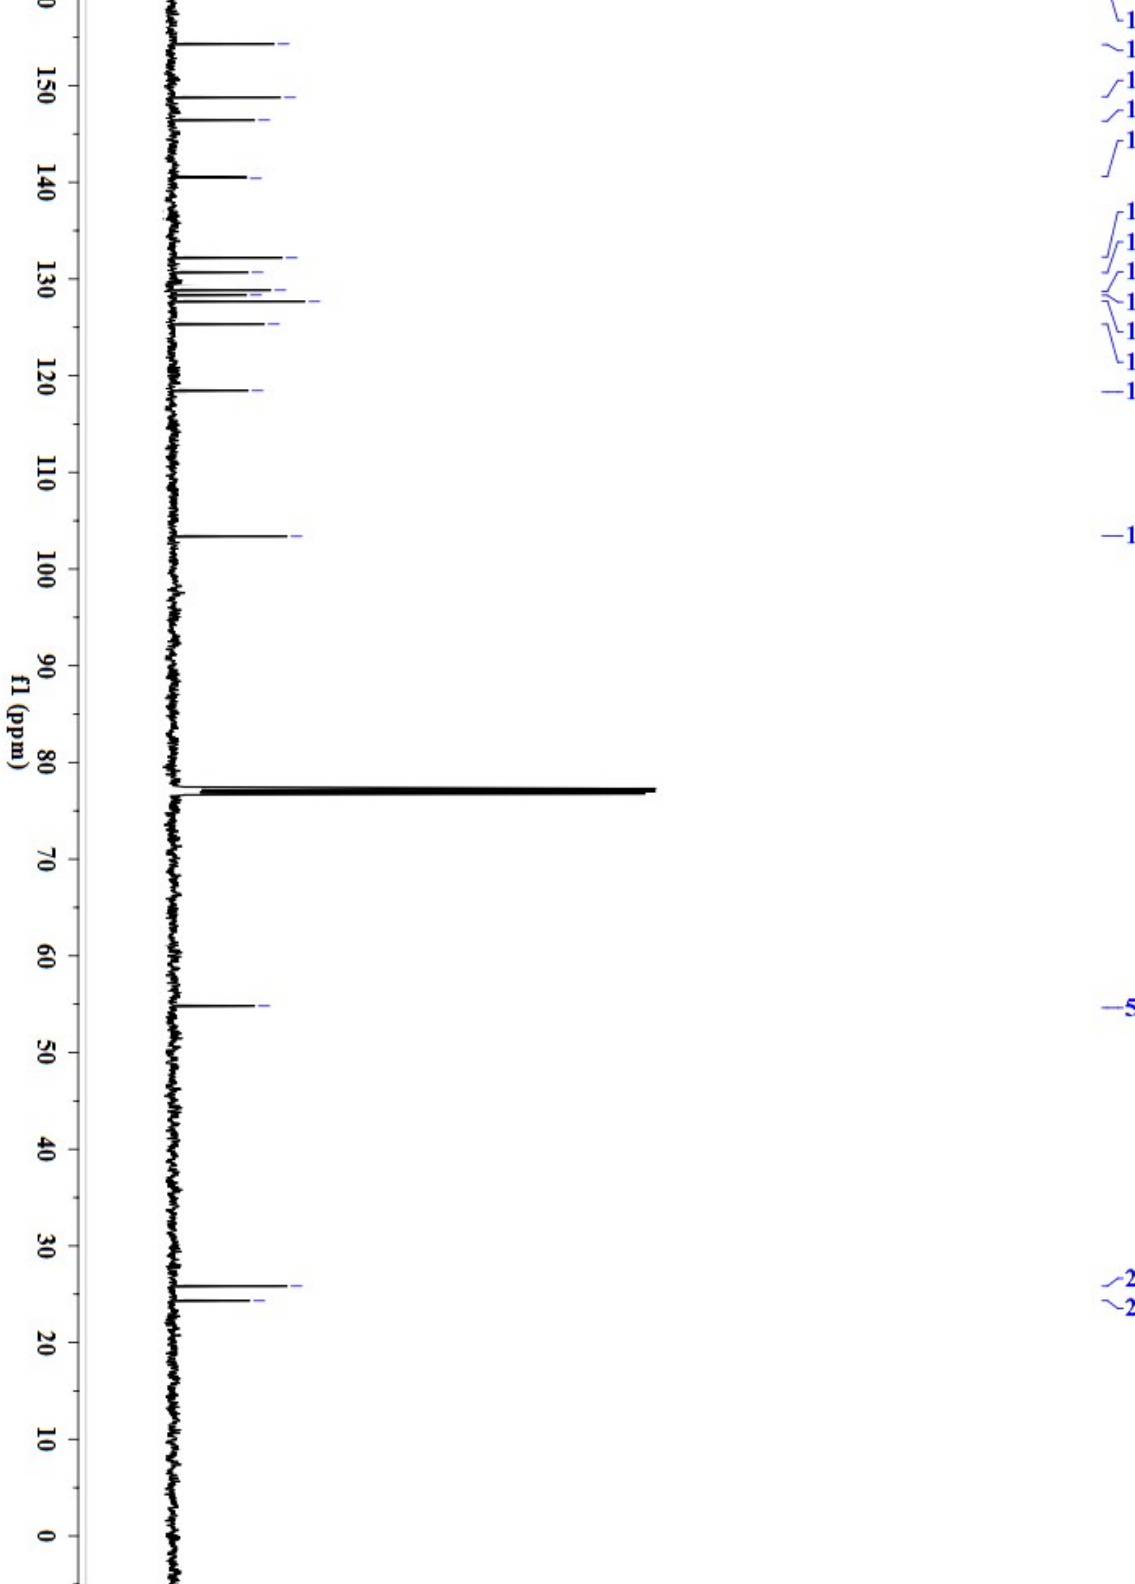

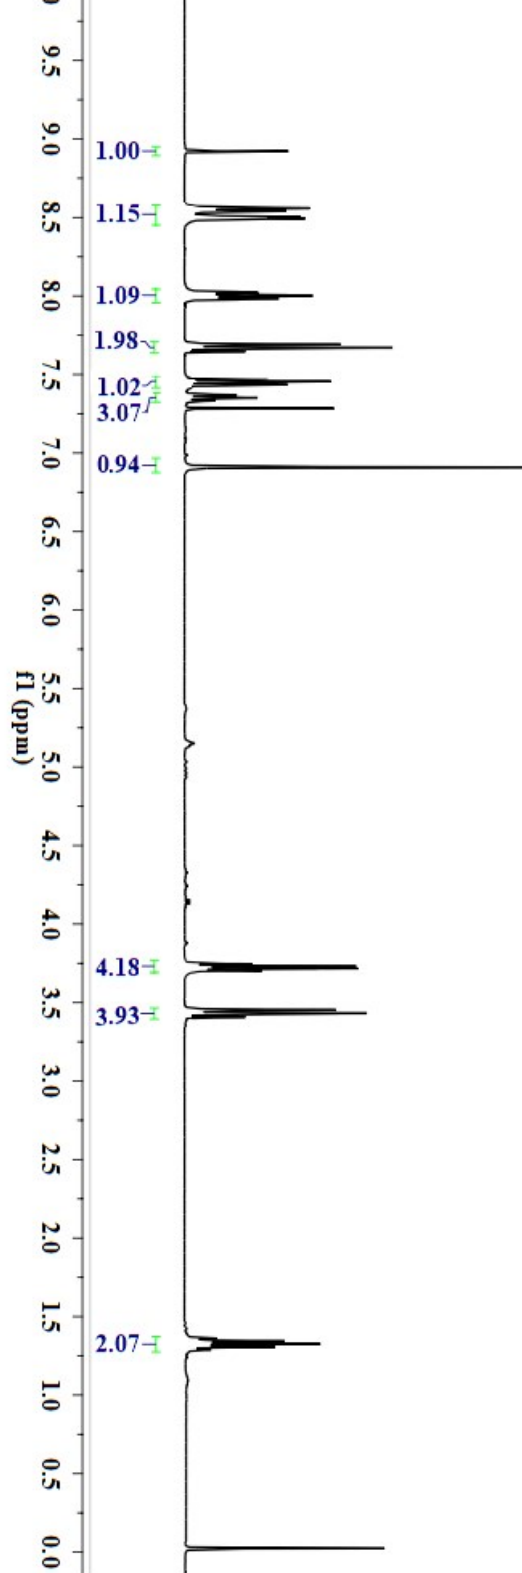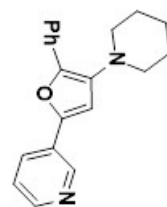

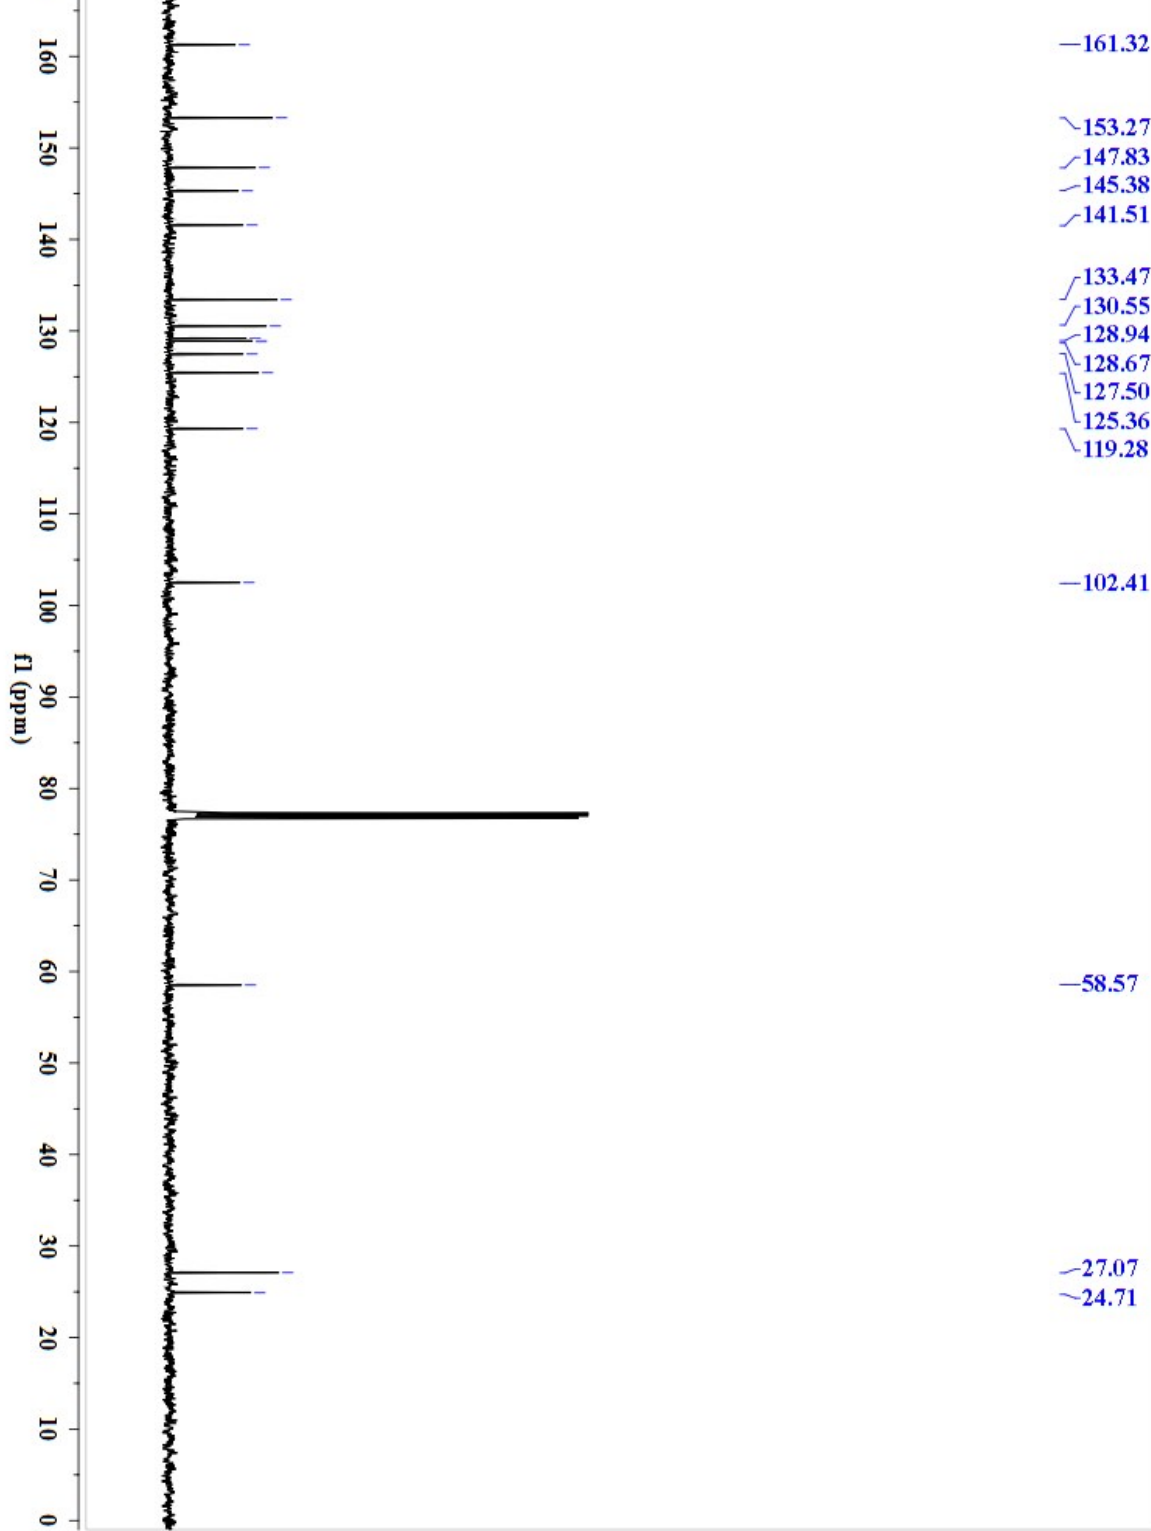

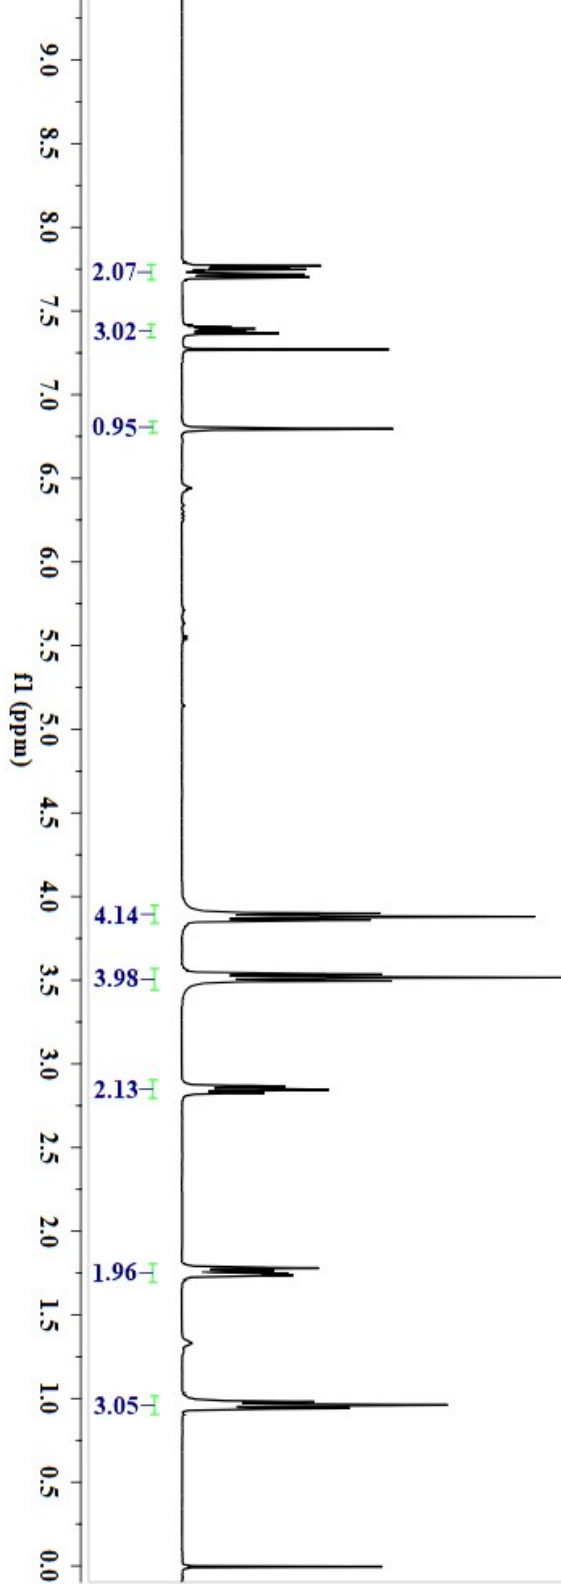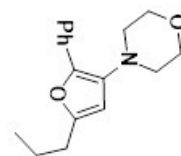



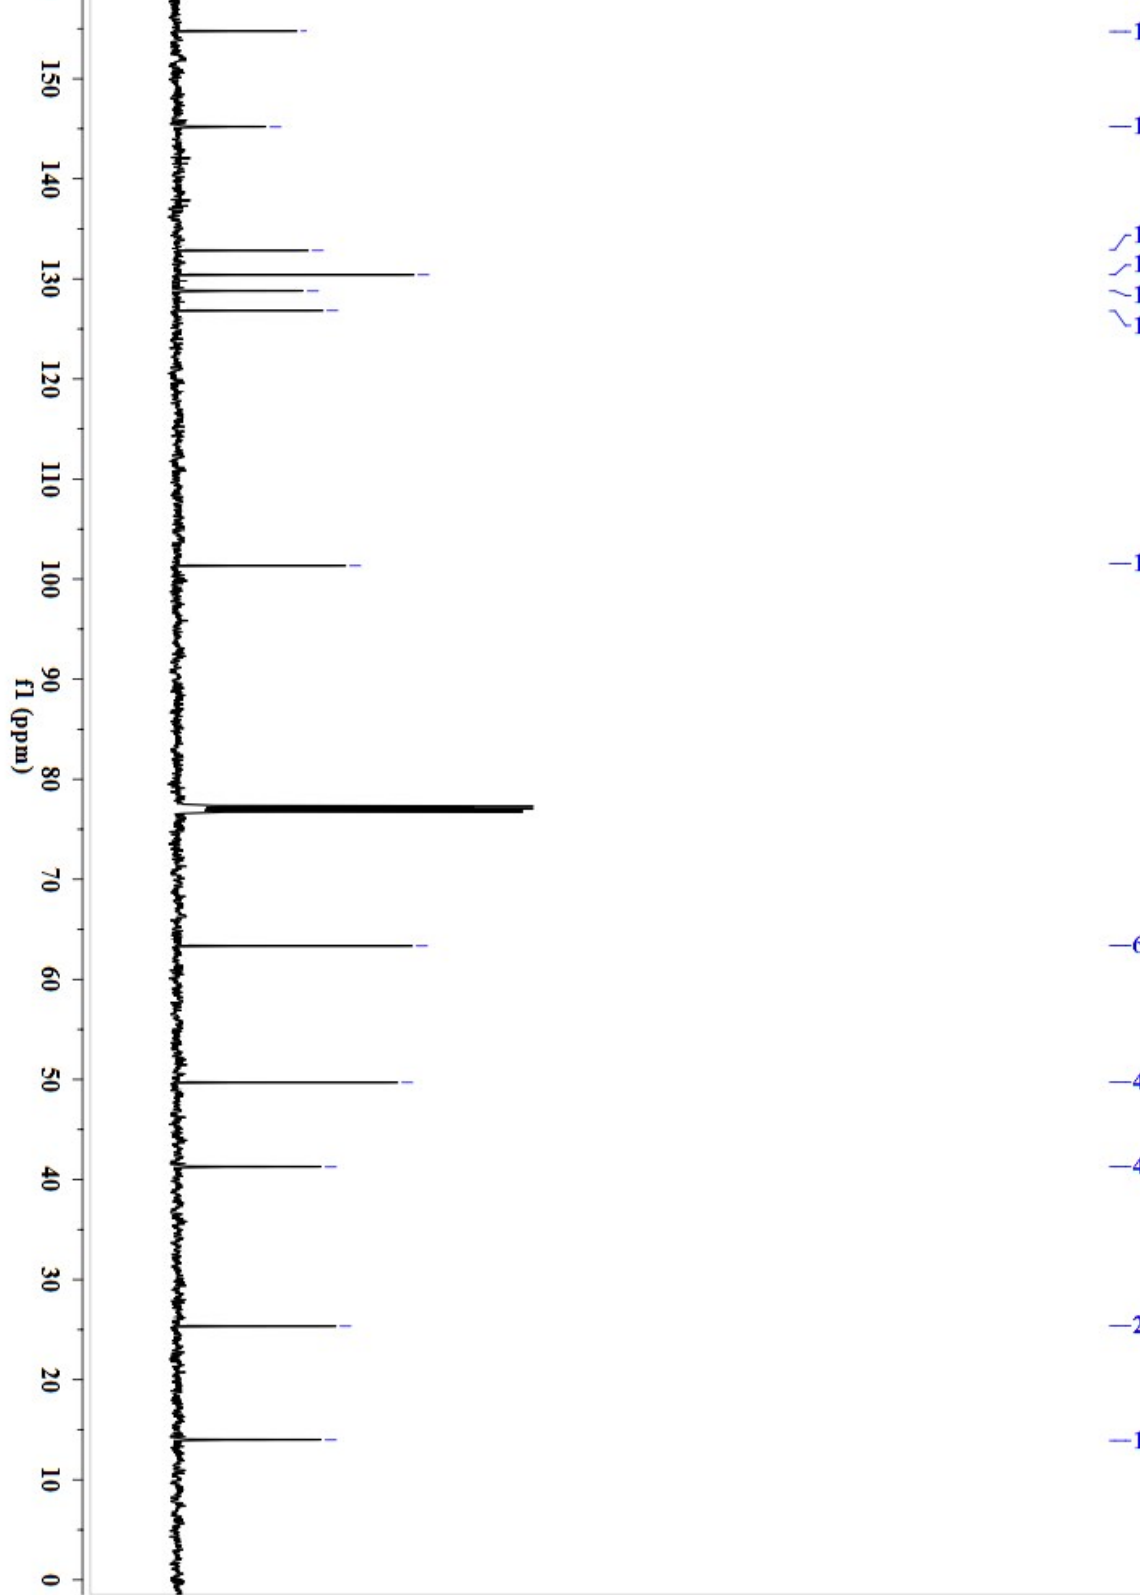

Supplement: d1ob01132d1.pdf [file d1ob01132d1.pdf]
